1 **Potential application of phage therapy for prophylactic treatment against *Pseudomonas***  
2 ***aeruginosa* biofilm Infections.**

3

4 Aditi **Gurkar**<sup>1#</sup>, Deepak **Balasubramanian**<sup>1£</sup>, Jayasheela **Manur**<sup>2</sup>, and Kalai **Mathee**<sup>1^\*</sup>

5

6 **Author Affiliations**

7 <sup>1</sup>Department of Biological Sciences, Florida International University, Miami, Florida,  
8 United States of America; <sup>2</sup>GangaGen Inc, Bangalore, Karnataka State, India.

9

10 **Current Address**

11 <sup>^</sup>Department of Human and Molecular Genetics, Herbert Wertheim College of  
12 Medicine, Biomolecular Sciences Institute, Florida International University, Miami, United  
13 States of America

14

15 **Present Address**

16 <sup>#</sup>Department of Medicine, University of Pittsburgh, Pittsburgh, Pennsylvania, USA

17 <sup>£</sup>Vanderbilt University, School of Medicine, Nashville, Tennessee, USA.

18 <sup>^</sup>Herbert Wertheim College of Medicine, Florida International University, Miami,  
19 Florida, USA

20

21 **\*Corresponding author**

22 Kalai Mathee, MS, PhD, [matheelabfor65roses@gmail.com](mailto:matheelabfor65roses@gmail.com)

23 Telephone: 1-305-348-0628

24

25 **Keywords:**

26 **Running Title:**

27 **Subject Category:** Alternate Therapy

28 **Word Count:** 11576

29 **Abbreviations:** CF, Cystic Fibrosis; CFTR, Cystic Fibrosis Transmembrane Conductance  
30 Regulator Protein; *cfft*, cystic fibrosis transmembrane regulator gene; CV, Crystal violet;  
31 LB, Luria Bertani; OD, Optical Density; MBEC, Minimum Biofilm Eradication Concentration;  
32 *P. aeruginosa*, *Pseudomonas aeruginosa*; CBD, Calgary Biofilm Device; MIC, Minimum  
33 Inhibition Concentration; PVC, Polyvinyl Chloride; *K. pneumoniae*, *Klebsiella*  
34 *pneumoniae*; HIV, Human Immunodeficiency Virus; *M. avium*, *Mycobacterium avium*;  
35 MOI, Multiplicity of Infection; Phage, Bacteriophage; LD, Lethal Dose.

36

37

38 **ABSTRACT**

39

40 The majority of the microbial activity in humans is in the form of biofilms, i.e., an  
41 exopolysaccharide-enclosed bacterial mass. Unlike planktonic cells and the cells on the  
42 surface of the biofilm, the biofilm-embedded cells are more resistant to the effects of the  
43 antibiotics and the host cellular defense mechanisms. A combination of biofilm growth  
44 and inherent resistance prevents effective antibiotic treatment of *Pseudomonas*  
45 *aeruginosa* infections including those in patients with cystic fibrosis. Antibiotic resistance  
46 has led to an increasing interest in alternative modalities of treatment. Thus, phages that  
47 multiply *in situ* and in the presence of susceptible hosts can be used as natural, self-  
48 limiting, and profoundly penetrating antibacterial agents. The objective of this study is to  
49 identify active phages against a collection of *P. aeruginosa* isolates (PCOR strains)  
50 including the prototype PAO1 and the isogenic constitutively alginate-producing  
51 PDO300 strains. These PCOR strains were tested against six phages (P105, P134, P140,  
52 P168, P175B, and P182). The analysis shows 69 % of the PCOR isolates are sensitive and  
53 the rest are resistant to all six phages. These phages were then tested for their ability to  
54 inhibit biofilm formation using a modified biofilm assay. The analysis demonstrated that  
55 the sensitive strains showed increased resistance, but none of the susceptible strains from  
56 the initial screening were resistant. Using the minimum biofilm eradication concentration  
57 (MBEC) assay for biofilm formation, the biofilm eradication ability of the phages was  
58 tested. The data showed that a higher volume of phage was required to eradicate  
59 preformed biofilms than the amount required to prevent colonization of planktonic cells.  
60 This data supports the idea of phage therapy more as a prophylactic treatment.

61

## 62 INTRODUCTION

63 Phage therapy may provide a solution to the global problem of increasing  
64 resistance to conventional antibiotics (1; 2). This study analyzed the application of phage  
65 as a potential therapeutic agent against *Pseudomonas aeruginosa*, the primary cause  
66 of morbidity and mortality in cystic fibrosis (CF) patients. CF was first described in 1936 in  
67 Switzerland (3) and 1938 in the U.S.A. (4; 5). It is a fatal, inherited disease afflicting 1 in  
68 every 3500 live births in the USA (6) and occurs predominantly in Caucasians. The gene  
69 responsible for CF is located on chromosome 7 (7; 8) and encodes a protein of 1480  
70 amino acids; it is called the cystic fibrosis transmembrane conductance regulator (CFTR)  
71 (9). CFTR is a cyclic-AMP-activated chloride ion channel in the secretory epithelia (7; 10).  
72 A defect in CFTR leads to decreased fluid secretion, and the dehydration of the epithelial  
73 surfaces leads to the pathology of the disease (11). Over-secretion of mucus into the  
74 airway leads to congestion of the respiratory tract and increased susceptibility to  
75 bronchopulmonary infection (12). In spite of extensive research, CF patients continue to  
76 suffer from these chronic diseases, which are the leading cause of their mortality (13). The  
77 median survival for these patients in the USA is 29.6 years (6). Further research may not  
78 only improve the quality of their lives but increase their median survival age (6).

79 CF patients are primarily infected with respiratory viruses, especially respiratory  
80 syncytial viruses, leading to acute pulmonary disease soon after birth. Respiratory  
81 syncytial virus infection decreases the pulmonary function in these patients by 30 % in  
82 approximately one month (14; 15; 16). The viral infection is followed by secondary  
83 colonization and infection by bacteria such as *Staphylococcus aureus*, *Haemophilus*  
84 *influenzae*, and *P. aeruginosa* (17). In recent times, cross infection by various pathogens  
85 such as *Burkholderia cenocepacia* complex and *Pandora* spp. has been of significant

86 concern in the later stage of CF disease (18; 19). *S. aureus* and *H. influenzae* can  
87 efficiently be eradicated using oral antibiotics (20; 21), but the *P. aeruginosa* infection,  
88 which occurs in 60 to 90 % of patients with CF, is never eradicated despite intensive anti-  
89 pseudomonal treatment (17).

90 *P. aeruginosa* is a Gram-negative bacterium that is ubiquitous; it infects nearly  
91 every human tissue and is one of the most common causes of nosocomial pneumonia,  
92 urinary tract infections and wound sepsis (22). It is an opportunistic pathogen that affects  
93 immunocompromised patients such as those with cancer, HIV, and burns (22). It is also a  
94 leading pathogen responsible for the morbidity and mortality among patients with CF,  
95 diffused pan bronchitis, and chronic obstructive pulmonary disease. The initial and  
96 intermittent colonization of CF lungs by non-mucoid *P. aeruginosa* can be eradicated by  
97 early, aggressive antibiotic therapy. However, such treatment generally fails in later  
98 stages when the colony morphology of bacteria, isolated from sputum samples,  
99 becomes mucoid (23). The mucoid phenotype is due to overproduction of a capsule-  
100 like polysaccharide called alginate (24), and this energy-consuming production of  
101 alginate may be necessary in the formation of biofilms as this helps them to adhere to  
102 surfaces (25; 26).

103 Biofilms are matrix-enclosed organized microbial communities, adherent to each  
104 other and to surfaces or interfaces (27); biofilm growth is now known to be the natural  
105 mode of microbial growth. The formation of a biofilm is defined to be a developmental  
106 process, consisting of five stages: (1) attachment; (2) monolayer formation; (3)  
107 microcolony formation (4) biofilm maturation, and (5) release of planktonic cells (26; 28;  
108 29). The mature biofilms release planktonic bacteria starting the whole process again  
109 (30). Mature biofilms are composed of cells and matrix material located in matrix-

110 enclosed 'towers' and 'mushrooms' (28). This mode of growth produces a barrier to  
111 penetration of antimicrobial agents through the matrix, is responsible for the altered  
112 growth rate of these microbial communities, and other physiological and morphological  
113 changes that appear to favor their survival (28).

114 The current initial treatment for patients with acute CF infections comprises of a  
115 combination of antibiotic treatment with ciprofloxacin and inhalation of colistin for about  
116 three weeks (31; 32). The treatment for chronic infection is much more controversial, and  
117 a combination of antibiotics, including ciprofloxacin, imipenem, tobramycin, and  
118 aztreonam, is used (33). However, several drawbacks have been observed with this  
119 mode of treatment. Patients seem to develop allergies to  $\beta$ -lactam antibiotics (34; 35; 36;  
120 37), and the bacteria develop resistance (38; 39; 40; 41; 42).

121 *P. aeruginosa* exhibits intrinsic and acquired resistance to many structurally and  
122 functionally unrelated antibiotics. The biofilm mode of growth (43), low membrane  
123 permeability (44; 45), target alteration (38; 46), and extensive linkage of the outer  
124 membrane proteins (47; 48; 49; 50), are part of its intrinsic properties for resistance. Also,  
125 *P. aeruginosa* has acquired five efflux pumps that actively pump out the antibiotics (51;  
126 52; 53; 54; 55). The failure to successfully eradicate *P. aeruginosa* has prompted  
127 researchers to consider alternative approaches.

128 Treatment with vaccines and adjuvants, or the treatment with Interferon- $\gamma$  which  
129 is naturally produced by lymphocytes activated by specific antigens, or with the Chinese  
130 herbal medicine, *Daphne giraldii* Nitsche, decreases the inflammatory response and  
131 enhances the bacterial clearance in an animal model (56; 57; 58; 59). The Chinese herbal  
132 supplement ginseng also seems to be a promising alternative measure for the treatment  
133 of chronic *P. aeruginosa* lung infections in CF patients (60; 61; 62). Quorum-sensing

134 inhibitors (63), herbal supplements (64; 65; 66) and honey (67; 68) have also been  
135 proposed as potential alternatives to treat *P. aeruginosa* infections.

136 Another natural antimicrobial agent, bacteriophages or (phages), shows a new  
137 hope to conquer the drug-resistant bacteria. Bacteriophages were first discovered by  
138 Earnest Hankin in 1896 and they were rediscovered by Felix d'Herelle in 1901, who named  
139 them so for their ability to infect bacteria (69). D'Herelle immediately focused on these  
140 viruses' potential for treatment of bacterial diseases. This led to numerous research  
141 papers on phage therapy in the first half of the 20th century (69). However, a poor  
142 understanding of phage biology, difficulties in bacterial identification coupled with high  
143 specificity, and the discovery of broad-spectrum antibiotics caused phage therapy to  
144 quickly decline (70). But it has recently regained popularity, for treating a wide variety of  
145 diseases whose control with chemotherapeutic agents is difficult. Phages can be 'lytic'  
146 or 'lysogenic.' In the lytic cycle, a phage will convert the bacterial cell into a phage-  
147 producing factory releasing a large number of phages. In the lysogenic life cycle, there  
148 is no progeny produced; the phage DNA becomes part of the bacterial genome (71). It  
149 is preferable to use lytic phages in treatment because they quickly reproduce within and  
150 lyse the bacteria in their host range (72).

151 The use of phages as antimicrobial agents has some advantages over other  
152 current methods of microbial control. One significant advantage of phages is their  
153 narrow host range, which allows phage treatment to remove a problem organism  
154 without disturbing the local microflora (70). Also, unlike antibiotics, phages need to be  
155 administered for only a short duration. As long as susceptible bacteria are present, the  
156 number of phages increase as they work their way more in-depth in the biofilms, rather  
157 than decaying over time and distance, like antibiotics (73). Phage therapy is also

158 inexpensive, and it is less time-consuming to obtain phages on resistant strains than  
159 discovering new and useful drugs. Phages can potentially be used in conjunction with  
160 antibiotics to delay resistance. Nevertheless, there can be disadvantages associated  
161 with phage treatment. The narrow host range of phages may pose a problem. For  
162 example, any treatment for the bacteria associated with chronically infected CF patients  
163 would require very specific and strongly lytic phages (74). Phages are present  
164 ubiquitously with their host bacteria. However, infections do occur, suggesting that a  
165 higher dosage of phages may be required (75; 76). The phage preparations used for  
166 treatment usually have some bacterial debris, which can be harmful because this debris  
167 could have potential endotoxins (74). Anti-phage antibodies seem to appear a few  
168 weeks after administering phages, which might pose a problem when dealing with the  
169 treatment of chronic infections (77).

170         Because the advantages of phage therapy are many, it has been continually  
171 practiced in few places since its rediscovery by D'Herelle. Phage therapy is practiced on  
172 a small scale in Poland and the Republic of Georgia, Tbilisi (77). The bacterial pathogens  
173 targeted in these institutes include *S. aureus*, *P. aeruginosa*, *Klebsiella pneumoniae* and  
174 *Escherichia coli* (78). Phages used seem to cure about 90 % of the cases studied. In these  
175 carefully documented studies, it was shown that few human subjects complained about  
176 gastrointestinal pains (79). Fevers have also been associated with phage treatment.  
177 Although the cause remains unclear, there is a possibility that the crude solution of  
178 phages used may still have bacterial debris (79). Researchers are reluctant to use phage  
179 treatment systemically due to the fear of septic shock (79).

180         Phages have been studied to control bacteria implicated in causing food  
181 contamination by *E. coli*, *Listeria monocytogenes*, and *Salmonella* spp. (Table 1). Also,

182 phage therapy has been tested against *P. aeruginosa* infections using various model  
183 systems and humans (80; 81; 82). Most of these treatments have proved to be very  
184 effective (curing 90 - 95 %). Recent studies have looked at the use of phages to deliver  
185 genes into mammalian cells (83). Phages have also been looked at as vaccine  
186 candidates for hepatitis, human immunodeficiency virus and various other diseases (84).  
187 It has also been proposed that phage delivery during transplantation of organs, to treat  
188 associated infections may prove to be very helpful (85).

189 All these studies using phages seem to be as successful in comparison with studies  
190 that use antibiotics. This suggests that the safety factor linked with the usage of phages  
191 for treatment, insufficient negative immune host response and its efficacy hold promise  
192 as a future treatment for the bacterial infection in CF patients. Phages that have been  
193 effective against *P. aeruginosa* have been identified and studied (Table 1). These studies  
194 have used a single phage against a single strain. However, the *P. aeruginosa* genome is  
195 very diverse (86) and thus any phage to be used for treatment needs to be effective  
196 against a myriad of strains. The first aim of this study was to identify phages that would  
197 work against a large number of *P. aeruginosa* mucoid and non-mucoid strains. The  
198 second aim was to identify whether phages could be used to prevent biofilm formation,  
199 i.e., to avoid the initial adhesion of the bacteria. Finally, we wanted to determine if phage  
200 therapy could be used to eradicate preformed biofilms.

201

202



## 203 MATERIALS AND METHODS

204

205 **Bacterial strains, media, and culture.** *P. aeruginosa* isolates that were spatially,  
206 geographically and environmentally distinct, named PCOR isolates (Table 2), were used  
207 for the experiments (87). The prototype PAO1 and the constitutively alginate-producing  
208 isogenic variant PDO300 were also included in all the experiments. All the strains were  
209 streaked on Luria-Bertani (LB) agar plates (10 g tryptone, 5 g yeast extract, 10 g NaCl and  
210 15 g agar per liter). They were cultured in LB broth, (10 g tryptone, 5 g yeast extract, 5 g  
211 NaCl, per liter) at 37 °C. For antimicrobial susceptibility experiments, Cation Adjusted  
212 Muller Hinton Broth (CAMHB) (3 g beef extract, 17.5 g acid hydrolysate of Casein, 1.5 g  
213 starch per liter) (BD Biosciences, San Jose, CA) was used.

214 **Phage isolation.** Phages (Table 2) were isolated from the environment by  
215 GangaGen Inc, Bangalore, India. A fresh culture of the target strain (*P. aeruginosa*) was  
216 mixed in LB broth to which the environmental sample containing phage was added;  
217 cultures were incubated at 37 °C until complete lysis was observed. The sample was  
218 treated with 1 % chloroform and centrifuged at 16,000 g (Sigma Laboratory Centrifuges,  
219 4K 15, Germany) to remove any bacterial debris.

220 **Phage purification.** The propagating strain, the host *P. aeruginosa* PAO1, was  
221 streaked on to an LB agar plate and incubated at 37 °C for 24 h. A single colony was  
222 inoculated in 5 ml LB broth and incubated overnight at 37 °C. Fresh broth was inoculated  
223 on the following day with a 2 % inoculum; i.e., 2 ml overnight culture in a 100-ml broth.  
224 This culture was incubated in an air shaker until it reached an optical density (OD) of 0.5  
225 - 0.7 as measured with a spectrophotometer (Bio-Rad SmartSpec 3000, Hercules, CA). A  
226 lawn was made by adding the bacterial strain to an LB agar plate. This LB agar plate was

227 then allowed to dry for about 15 min. Five  $\mu$ L of the filtered phage was spotted onto this  
228 bacterial lawn (Figure 1). These plates were incubated for 24 h at 37 °C. A single lysed  
229 plaque from these plates was used to make pure phage stocks. Using this method, a  
230 collection consisting of over 100 phages against *P. aeruginosa* was isolated by  
231 GangaGen Inc. However, preliminary results with 11 phages suggested only six of them  
232 were required for 95 % efficacy against the PCOR isolates (data not shown). Therefore,  
233 only six phages, P105, P34, P140, P168, P175B and P182 were used for all further  
234 experiments. In order to purify these phage strains further, the prototypic strain PAO1 was  
235 used as the host cell (propagating strain) and the phage purification method was used  
236 with a slight modification as described above.

237 **Phage spot titer assay.** A five  $\mu$ L serial dilution of the filtered phage was spotted on  
238 the bacterial lawn plate and incubated for 24 h (Figure 1). For further calculations of the  
239 plaque forming units (PFU/ml) and multiplicity of infection (MOI), individual plaques at  
240 suitable dilutions were counted.

241 **Calculation of plaque forming units (PFU/ml) and the multiplicity of infection (MOI).**  
242 Phage-infected bacterial cultures were serially diluted using LB broth. A 100- $\mu$ L aliquot of  
243 an appropriate higher dilution was spread on LB agar plates, where individual plaques  
244 could be observed. The number of plaques (more than 25 and less than 300) formed on  
245 the bacterial lawn was counted. This number was used to back-calculate the  
246 approximate titer of the plaque forming units (PFU/ml).

247 **Phage stock preparation.** PAO1 was used as the propagating strain for  
248 amplification of all phages. An overnight culture was inoculated at 2 % (V/V) in LB broth  
249 and incubated at 37 °C, shaking at 320 g. When the cell density reached an OD of 0.5, it  
250 was infected with the desired phage at the MOI of 0.1 and incubated at 37 °C. OD

251 readings were taken hourly in order to follow the amount of lysis. When complete lysis  
252 (OD < 0.1) was observed, the phage solution was immediately harvested by adding 1 %  
253 of chloroform. In the absence of obvious lysis, the cultures were grown for 6 h, after which  
254 the phage-infected sample was treated with 1 % chloroform for 10 min at room  
255 temperature. This sample was centrifuged at 16,000 g for 20 min at 4 °C. The supernatant  
256 containing the newly-replicated phage was transferred to a new tube. A spot titer was  
257 performed to determine the new titer or PFU/ ml for each phage.

258 **Phage overlay.** A 2 % fresh inoculum of the bacterial target strain was incubated  
259 at 37 °C and grown until it attained an OD of 0.5. The phage dilution to be tested was  
260 selected using the spot titer assay. A 100 µl aliquot of the diluted phage was added to  
261 100 µl of the log-phase culture of the target strain and incubated for 5 min at 4°C to ensure  
262 adsorption. After which, 3 ml of soft agar was added to the adsorption mix and poured  
263 on the LB agar lawn. After an incubation period of 16 h, the numbers of plaques were  
264 counted and the PFU/ml was determined.

265 **Screening of PCOR isolates.** Planktonic cells of 67 PCOR isolates (Table 2) that were  
266 spatially, geographically and environmentally distinct were used for this experiment. The  
267 PCOR isolates consisted of 34 CF isolates, 14 other non-CF clinical isolates and 12 strains  
268 from the environment. Along with these the prototypic nonmucoid and their isogenic  
269 mucoid variant strains, PAO1 and PDO300 were tested against the six tested phages,  
270 P105, P134, P140, P168, P175B, and P182 (Table 2). Overnight cultures of all 69 strains were  
271 inoculated in fresh LB broth until an OD 0.5 was obtained. A lawn culture of the bacterial  
272 strain to be tested was grown on LB agar. The phage stock was serially diluted using LB  
273 broth, and a 5 µl of the serial dilutions, ranging from 10<sup>-1</sup> to 10<sup>-5</sup>, was spotted on the

274 prepared lawn culture (Figure 1). The sensitivity of the strain to the phages was  
275 determined as follows:

- 276 • **Sensitive:** Clear lysis at the highest dilution; the strain was sensitive at a low titer, i.e.  
277 sensitive even at a very high dilution of phage.
- 278 • **Intermediate Sensitivity:** Lysis at a dilution of  $10^{-4}$ ; the strain was sensitive at an  
279 intermediate phage titer.
- 280 • **Low Sensitivity:** Lysis at  $10^{-2}$ ; the strain was sensitive at a high phage titer.
- 281 • **Resistant:** No lysis or lysis only at undiluted concentration; the strain was resistant.

282

283 **Biofilm inhibition assay (BIA).** Biofilm formation is the natural mode of growth for  
284 bacteria. Biofilms consists of sessile bacteria firmly attached to surfaces and each other  
285 via exopolysaccharide production conferring additional resistance to antibiotics (88). In  
286 order to identify phages that would inhibit *P. aeruginosa* biofilm formation, we tested the  
287 ability of the six isolated phages to inhibit biofilm initiation using the Biofilm Inhibition Assay  
288 (BIA) (Figure 2) (89). The phage-sensitive PCOR isolates (46/69) were examined for biofilm  
289 inhibition. The strain to be tested was diluted 1:100, and 100  $\mu$ l of the diluted bacteria  
290 were inoculated into each well of a 96-well polyvinyl chloride (PVC) plate (Falcon, BD  
291 Biosciences, San Jose, CA). In addition to the bacteria, phages at increasing MOIs  
292 ranging from 0.1, 1.0, 2.5 and 5.0, were initially added to the plate. If inhibition of bacteria  
293 was not observed at an MOI of 5.0, the MOIs were further increased to 10, 20, 40 and 80.  
294 A negative control with no phage was also added to the plate. These plates were  
295 incubated at 30°C for 10 h. All samples were run in duplicate. After the incubation period,  
296 25  $\mu$ l of crystal violet (CV) was added to each well, and the plate was incubated at room  
297 temperature for 15 min. Crystal violet was absorbed by the cells adhered to the wells,

298 indicating the formation of a biofilm (Figure 3). After 15 min, the plates were rinsed with  
299 water repeatedly to release unbound planktonic cells.

300 To determine the amount of bound biofilm, 200  $\mu$ L of 95 % ethanol was used to  
301 solubilize the CV-stained biofilm. A 125- $\mu$ L aliquot of this solution was transferred to a  
302 polystyrene 96-well microtiter plate (Corning INC, Corning, NY), and the absorbance was  
303 measured at 600 nm (Packard Plate Reader Version 3.0, Ramsey, Minnesota). A higher  
304 OD reading indicated resistant bacterial strains, while a lower reading indicated more  
305 sensitive bacterial strains.

306 ***Planktonic inhibition and biofilm eradication assay using phages.*** Not only it is  
307 important to inhibit the formation of biofilms, but it is also much more important to test  
308 the ability of phages to eradicate mature biofilms. To test this, four of the PCOR strains  
309 were selected based on their sensitivity to phages P140, P168 and P175B, the phages that  
310 worked best in the BIA. All these strains were inhibited at MOIs of 10 to at least two of the  
311 phages used. We included the standard prototypic strain PAO1 and its mucoid derivative  
312 PDO300 in further tests. The biofilm eradication assay was performed as described  
313 previously (90). We used the Calgary Biofilm Device (CBD), which is a two-part device.  
314 One part is a microtiter plate lid having 96 pegs, which provides the surface for uniform  
315 biofilm development. The second part is the regular microtiter 96 well plate into which  
316 the pegs fit precisely.

317 To perform this assay (Figure 4), the strains were inoculated in LB broth overnight  
318 at 37 °C in an air shaker. The following day, a 200  $\mu$ l aliquot of a diluted (1:30) overnight  
319 culture was inoculated into the CBD wells and incubated for 24 h at 37 °C, shaking at 132  
320 g. The next day the pegs were washed using 0.9 % saline solution to remove any  
321 planktonic bacterial cells. A challenge plate was prepared using a positive control (no-

322 phage) and negative control (CAMHB broth). The selected phages, at different MOIs,  
323 were individually placed in one well of the challenge plate. This plate was incubated at  
324 37 °C in an air shaker at 320 g for 24 h. The next day the turbidity was determined by  
325 measuring the OD at 600 nm in a plate reader (Hewlett Packard 600, Illinois). A higher OD  
326 reading suggested the growth of surviving planktonic bacteria. An OD of less than 0.1  
327 indicated the minimum number of phages required to inhibit planktonic bacterial  
328 growth. This was equivalent to the **minimum inhibitory concentration (MIC)**.

329 The pegged lid with the coat of biofilm was rinsed in 0.9 % saline solution, placed  
330 into fresh CAMHB media and chilled on ice. The biofilm was dislodged by sonicating each  
331 peg for 10 seconds using the Microson XL Ultrasonic (Heat Systems, Inc, Farmingdale, NY).  
332 The pegged lid was discarded and the plate incubated for another 24 h to determine  
333 the number of surviving bacteria. The following day the turbidity was determined by  
334 measuring the OD at 600 nm in a plate reader. The **minimum biofilm eradication**  
335 **concentration (MBEC)** value was determined as the minimum concentration of phage  
336 required (when the OD is less than 0.1) for the eradication of the biofilm cells.

337

338

339

340

341

342

343

## RESULTS

344

345       **Screening of PCOR isolates to isolate the most effective phages.** Of the 69 spatially,  
346 environmentally and geographically distinct strains of PCOR isolates tested, 48 were  
347 clinical isolates, of which 34 were from CF patients (Table 3) of which only 23 (68 %) were  
348 sensitive to phages. Out of these, 15 were sensitive at low titer (Supplement Table 1). Of  
349 the 69 strains, 23 (33 %) of them were completely resistant to all six phages. However, 46  
350 of the 69 strains (67 %) were sensitive when tested against the six phages (Table 4).

351       The most effective phage in our collection was P140, which lysed 74 % of the  
352 sensitive strains screened (Table 5). The phage that was least effective was P105, lysing  
353 only 39 % of the sensitive strains. Though P140 worked the best on the total number of  
354 strains, P134 was more effective in lysing 23 (51 %) of the sensitive strains at a low titer.  
355 Hence, at a low titer, we had 23 strains sensitive to P134, 10 strains sensitive to P140 and  
356 seven of them required P175B. Out of the other five strains that were sensitive at low titer,  
357 two required P105, two were sensitive to P182 and only one needed P168.

358       No single phage was observed to be effective against all sensitive strains. All six  
359 phages were needed to lyse all the strains at low or intermediate titer (Table 5). However,  
360 100 % efficacy was reached with only four (P105, P134, P140 and P168) if higher titer was  
361 used. For example, P140 was effective against most strains but only worked against 20  
362 bacterial strains that were sensitive to it at a low titer, i.e. even at the highest dilution of  
363  $10^{-6}$  and seven strains that were sensitive at a high titer, i.e. only at undiluted or  $10^{-1}$   
364 dilution.

365       **Alginate production decreases the sensitivity of the phages.** The 69 strains tested  
366 included seven mucoid strains. Five (71 %) of these were resistant to all six phages.

367 Although the sample size was small, alginate production appears to confer increased  
368 resistance to the phages tested.

369 ***Inhibition of biofilm initiation.*** Since the natural mode of growth of *P. aeruginosa* is  
370 biofilms, all 46 of the sensitive strains were screened against the six phages individually in  
371 the BIA. Although all the strains' cultures started at the same cell density at the planktonic  
372 stage, they all demonstrated different abilities to adhere to surfaces and form biofilms.  
373 This was reflected by the different optical density readings after 10 hours of incubation  
374 (Figure 5). For an example PAO1, KGN1654, KGN1648, KGN1705 had an OD of 0.658,  
375 0.997, 1.079 and 0.684, respectively.

376 Some of the 46 strains were found to be resistant at lower MOIs of 0.1, 1.0, 2.5 and  
377 5.0 (Figure 5). However, none of the strains were completely resistant when the MOIs were  
378 increased. The LD<sub>50</sub> varied from strain to strain some requiring higher MOIs as opposed to  
379 others (Figure 6). Among the strains tested, 35 of the 46 (76 %) were sensitive at the MOI  
380 of 10 (Table 6). Nine (20 %) of the bacterial strains were sensitive at an MOI of 20. When  
381 a higher MOI of 40 was tested, one more strain tested sensitive. Only two of the strains  
382 required 80, the highest MOI tested (Table 6).

383 The phages that were most effective against planktonic cells were not necessarily  
384 the most effective in inhibiting biofilm adhesion. For example, P134 was the most efficient  
385 phage that lysed 23 strains at low titer in the spot titer assay. However, the most effective  
386 phage against biofilm initiation was P140. The phage P140 was able to lyse 36 (78 %) of  
387 the bacterial strains and (41 %) of them were sensitive at a low MOI of 10, nine (29 %) were sensitive at an MOI of 20, while five (14 %) were sensitive at a higher MOI of 40 (Table  
389 6).



390 No single phage was observed to be effective against all sensitive strains.  
391 However, for 100 % efficacy, all six phages were required (Table 6). Since it is necessary  
392 to use phages that would work at low MOIs, we had 35 (74 %) strains that were sensitive  
393 at an MOI of 10 although we had to use all six phages (Table 7). However, by increasing  
394 the MOI, we noticed that more strains could be covered with a lower number of  
395 phages (Table 7). For example, for all 47 strains to be sensitive we just needed four  
396 phages. Hence, in this case, a complete (100 %) efficiency required a cocktail of four of  
397 the six phages: P105, P140, P134 and 168. However, for 100 % efficiency much higher  
398 MOIs are required than were used in the assay for planktonic cells.

399 **Dose-Dependent inhibition of biofilm formation by phages:** For therapeutic  
400 purposes, it is important to establish that biofilm inhibition occurs at phage in a dose-  
401 dependent manner. The dose-dependency was tested in the BIA assay by adding  
402 phages at different MOIs (Figure 5). As controls, we also included two resistant strains,  
403 PDO300 and 1647 (data not shown). As expected, for the resistant strains, the OD  
404 measured the same at all the MOIs tested. The most sensitive strains showed the  
405 strongest inhibition at an MOI of 5 as compared to an MOI of 1 (Figure 5). For example,  
406 the strain KGN1704 tested against P175B showed a drop in the OD<sub>600</sub> from ~1.6 to 0.2  
407 going from no addition of phage to MOI of 5. The dose-dependent inhibition of biofilm  
408 can also be observed at a higher MOI (Figure 6). All the sensitive strains showed this  
409 behavior (data not shown).

410 **Phages can be used against mature *P. aeruginosa* biofilms and prevent**  
411 **recolonization of planktonic cells.** Out of the four strains tested three of them were  
412 sensitive to the phages. However, they required a higher MOI for both the minimum  
413 inhibition concentration (MIC) and the minimum biofilm eradication concentration

414 (MBEC). For example, KGN1653 was sensitive at an MOI of 10 in the BIA, whereas the  
415 same strain had a MIC of 100 and MBEC of 200 (Figure 7) when tested against the same  
416 phage in the biofilm eradication assay. Similarly, the prototypic strain PAO1 needed even  
417 higher MOIs; more than 300 to eradicate the mature biofilm (Table 8).

418

419

420

421

422

## DISCUSSION

423

424

425

426

427

428

429

430

431

432

433

434

435

436

437

438

439

440

441

442

443

444

445

446

Experiments demonstrating the potential application of phage therapy against bacterial diseases such as diarrhea caused by *E. coli* O157, tuberculosis caused by *Mycobacterium tuberculosis* and *M. avium*, invasive gastroenteritis caused by *Vibrio vulnificus* has renewed interest in phages and their various uses (91; 92; 93; 94). *P. aeruginosa* is resistant to a large number of antibiotics (1; 2) and resistance of this bacterium has increased over time and even an increase of a thousand-fold has been observed (95). This increase in resistance raises the need to explore other effective modalities of treatment. Our results show that phages can be effective against a variety of *P. aeruginosa* strains *in vitro*. Effectiveness depends on the developmental stage of the bacterial biofilms and is dose-dependent.

**Phages are effective against a large number of *P. aeruginosa* strains.** A number of clinical studies have explored the use of phages against a limited number of *P. aeruginosa* infections (78; 81; 82). *P. aeruginosa* strains are genomically diverse (86; 96). Ideally, a phage chosen for therapy should be effective against the diverse genome of *P. aeruginosa*. Hence, a library of PCOR isolates (Table 2) that were spatially, environmentally and geographically distinct, as well as the prototypic nonmucoid PAO1 and its isogenic mucoid variant PDO300, were tested against six phages P105, P134, P140, P168, P175B and P182. The results obtained showed that this set of phages was effective against 46 out of the 69 strains (Table 3). These results support further investigation of this method of treatment. Since 23 of the total strains tested were resistant out of which 11 were isolated from CF patients, there is a need for more phages to be isolated and tested.

447 No single phage was effective against all the PCOR strains. But only four of the six  
448 phages were required for 100 % efficacy (Table 7). Thus, it is very important to test the  
449 effectiveness of each of these phages against an infection before any treatment. Once  
450 a sputum culture is obtained from a patient and the bacteria isolated, it is necessary to  
451 perform a spot titer just like an antibiogram that is performed in hospital settings today.  
452 Alternatively, one could use a cocktail of phages for treatment. But before attempting  
453 this, the behavior of phage cocktails against resistant strains needs to be further  
454 elucidated. The effectiveness of a phage cocktail against *P. aeruginosa* and other  
455 pathogens has been demonstrated by using animal infection models (97). Animal studies  
456 support phage cocktails. It is believed that if cocktails are used for treatment the strains  
457 will be sensitive to some of the phages and this will be a more effective approach (98).  
458 Other studies suggest that using cocktails is important for bacterial sensitivity to phages  
459 for a longer period of time, i.e. resistance to the phages will develop much slower. Both  
460 of these factors have been well demonstrated by using *E. coli* infections in calves, piglets  
461 and lambs (73; 99) as an animal model (73) and in *P. aeruginosa* infections in human  
462 subjects (82).

463 Our data suggested that four of the six phages tested were required for 100 %  
464 efficacy (Table 7). Isolations of much more effective phages or construction of more  
465 virulent phages could reduce this number to maybe one or two and enhance the  
466 potential use of this therapy (100). These phages need to be effective against the  
467 bacterial strains at low titer, just like the 35 PCOR strains that were sensitive to the six  
468 phages at the highest dilution, since this will decrease the probability of any side effects.  
469 Isolation of more efficient phages can be done by using the modern understanding of  
470 bacterial virulence and targeting phages at virulence. It has been demonstrated that *E.*

471 *coli* phages that were selected on the basis of superior attachment to the K1 antigen in  
472 *E. coli* strains were more effective against diarrhea in calves (73).

473 **Alginate production decreases the sensitivity of the phages.** Of the *P. aeruginosa*  
474 strains isolated from the lungs of CF patients with advanced stages of disease, 85 % of  
475 the strains showed a mucoid colony phenotype (101), whereas only 1 % of the bacteria  
476 isolated from other sites of infection had a mucoid morphology (102). These observations  
477 suggest that mucoid *P. aeruginosa* cells have an added advantage, and can survive in  
478 the CF lung environment. This distinctive mucoid morphology is due to the  
479 overproduction of the exopolysaccharide alginate, an O-acetylated linear polymer of  
480 D-mannuronate and L-guluronate residues (24). This expression leads to increased  
481 resistance by *P. aeruginosa* against the host's immune response, leading to chronic  
482 pulmonary infection and poor prognosis for the patient (103; 104). Infection with alginate-  
483 producing *P. aeruginosa* in CF patients has been associated with an overactive immune  
484 response from infection to clearance and a poor clinical condition, suggesting that  
485 alginate production is a virulence factor (23; 62; 105). This exopolysaccharide layer is  
486 known to envelop the biofilm decreasing the permeability of antibacterial drugs to the  
487 cells (27).

488 Five of the seven mucoid strains included in the planktonic spot titer assay were  
489 resistant to phages. This suggests that alginate production by *P. aeruginosa*, switched on  
490 due to various stress factors in the harsh lung environment of the CF patients (25), could  
491 also protect the bacteria from phage infection. Our data showed that alginate  
492 production served as a barrier against the phages. A previous study with a  
493 bacteriophage that was able to reduce the viscosity of the exopolysaccharide, thus  
494 penetrating deep within and infecting the bacteria has been reported (106). Hanlon's

495 study, however, used just one mucoid strain and hence this result might not apply to all  
496 *P. aeruginosa* mucoid strains.

497 Our study emphasizes the need to test all of the mucoid strains against more  
498 phages or, probably, a combination of phages. For example, in our preliminary tests with  
499 an additional phage, P1058, one more mucoid strain was shown to be sensitive,  
500 encouraging isolation and further study of similar phages.

501 **Phages can be used to prevent biofilm initiation.** Biofilm formation is a natural  
502 mode of growth for *P. aeruginosa* (27); it is also an important phenotype associated with  
503 CF patients (104). The formation of a biofilm can be viewed as a developmental process  
504 having five stages: adhesion (initiation), monolayer formation, microcolony formation,  
505 maturation and dispersion (25; 28; 29). In this study, we evaluated the effectiveness of  
506 phages against biofilm initiation adhesion using the biofilm inhibition assay (BIA) (89). The  
507 phage-sensitive PCOR strains in the planktonic system were analyzed. Our results showed  
508 that each of these strains had varying adherence properties suggesting that biofilm  
509 formation is not the same with all strains. This confirmed previous findings with *P.*  
510 *aeruginosa* PAO1 and 31 other strains that included CF isolates (107).

511 As compared to the planktonic cells, the biofilm cells required higher MOI,  
512 varying from 10 to 80. None of the strains were resistant at the highest multiplicity of  
513 infection (MOI) used. This suggests that some *P. aeruginosa* strains need a higher  
514 dosage of phage for clearance. This finding is consistent with other antibacterial studies  
515 that have found an increase in resistance of the biofilm cells as compared with the  
516 planktonic form, with resistance increasing from 100 to 1000-fold (2; 90; 108; 109; 110;).  
517 These results indicate that researchers seeking phages for therapy need to isolate  
518 phages that will be effective not only on planktonic cells but also against biofilms. Since

519 it is desirable to use smaller doses for any treatment regimen, it is necessary to identify  
520 isolated phages that are effective at low MOIs. The difference in the adhesion property  
521 and the range of MOI required to inhibit biofilm formation are reflective of *P.*  
522 *aeruginosa* diversity.

523 Our two most effective phages against biofilm initiation were P140 and P134,  
524 covering 79 % of the isolates. Therefore, a cocktail of the two effective phages might turn  
525 out to be more effective than the individual phages themselves. P134, the most effective  
526 phage on planktonic cells, covering 50 % strains at low titer, was not as effective against  
527 *P. aeruginosa* biofilms. Thus, there need not be a strong correlation between planktonic  
528 and biofilm cell sensitivity and indicates the need for future studies on biofilm  
529 susceptibility. Any phages that are isolated against *P. aeruginosa* have to be tested  
530 against both experimental systems before using them in animal or human experiments.

531 **Dose dependency inhibition of biofilm formation by phages.** Dose-dependent  
532 studies have been conducted on *E. coli* infected with phages, and they all indicate an  
533 increase in sensitivity when challenged with higher doses of the species-specific phages  
534 (111; 112). When the biofilm inhibition assay (BIA) was performed using four different  
535 multiplicities of infections (MOIs') (Figure 5 and 6) the lethal dose 50 (LD<sub>50</sub>) seemed to be  
536 dose-dependent. The higher the multiplicity of infection used, the more killing was  
537 observed.

538 However, higher dosages of phages can have side effects. Human subject  
539 studies in phage therapy have associated pain in the liver area reported around day 3-  
540 5; this pain, though not severe, could last for several hours (113). This might be due to  
541 the release of endotoxins, as a result of extensive lysis by the phages (79). Also in the  
542 most severe cases, fever was observed for 24 h lasting for 7-8 days (79). Treatments with

543 high doses of phages by intravenous administration have not been recommended due  
544 to septic shock (113).

545 Prevention of infection for better management of CF is an important goal worth  
546 pursuing. Hence, our results suggest that the lowest MOI needed to inhibit biofilm  
547 formation and growth needs to be determined in future studies using appropriate animal  
548 models. For strains that need high MOI, we need to further isolate suitable phages or  
549 construct effective recombinant phages.

550 **Phages are useful in biofilm eradication.** Often, treatment commences upon  
551 identification of infection. Therefore, it is important to identify phages that are effective  
552 against preformed biofilm and in preventing planktonic bacteria from recolonizing. Our  
553 study indicated that a very high MOI was required for successful eradication of biofilms.  
554 Probably, it would be more helpful to use genetically engineered phages that are more  
555 virulent by nature (114). However, our study also suggests that phages may be an  
556 important prophylactic treatment, since the bacterial strains tested were sensitive at a  
557 low MOI of 10 in the biofilm inhibition assay. Phages for prophylaxis against potential  
558 infection have been supported by many studies. For example, the study on vancomycin-  
559 resistant *Enterococcus faecium* showed that 100 % of the animals could be saved when  
560 phage was delivered within 45 min of infection, however, when phage was delivered 24  
561 h later when the infection caused morbidity only 50 % of the animals could be saved (92).  
562 Similar studies on *E. coli* respiratory infection using broiler chickens as models, *S. aureus*  
563 infections in rabbit models and studies correlating seasonal epidemics of cholera with  
564 low phage prevalence certainly encourage phage therapy as prophylactic treatment  
565 (111; 112; 115; 116).



566           The increasing antibiotic resistance in this microbe has stirred interests amongst  
567 various other antibacterial communities. Using phages for treatment has great  
568 advantages and hence should be strongly considered as an alternate or as a  
569 conjunction to antibiotics. In conclusion of this study, additional phages need to be  
570 isolated from the environment, especially from CF sputum and lungs. These phages need  
571 to be tested on planktonic cells but more importantly on biofilms. Since no single phage  
572 seems to be effective on the vast and diverse genome of *P. aeruginosa* a combination  
573 of different phages needs to be considered. Further characterization of these phages  
574 might reveal a better mode of treatment. Thus, phage therapy is a promise and hope to  
575 all the unfortunate victims of this infamous pathogen.

576  
577 **Funding Information**

578 This research was supported by NIH-National Institute of Allergy and Infectious Diseases  
579 (NIAID) 1R15AI111210 (to KM and HK), NIH-National Institute of General Medical Sciences  
580 (NIGMS) T34 GM08368 (to LF) and R25 GM061347 (to CD), and FIU presidential fellowship  
581 and teaching assistantship (to SP). The funders had no role in study design, data  
582 collection and analysis, decision to publish, or preparation of the manuscript.

583

584

585 **Acknowledgements**

586 We thank members of the Mathee laboratory for their valuable insights, especially  
587 Alexandra Tchir for formatting the manuscript.

588 This work is part of an Undergraduate Honors Thesis submitted in partial fulfillment of the  
589 requirements for the degree of Bachelor of Science in Biological Sciences with Honors at  
590 the Florida International University, Miami, FL.

591

592 **Conflicts of Interest**

593 There is no conflict of interest.

594

595 **Ethical Statement**

596 Not applicable.

597

598

599

600

601

602

603

604

605

606 **Figure Legends**

607

608 **Figure 1: Spot titer assay.** When the bacterial PAO1 lawn was seeded with phage P140 at  
609 serial dilutions, PAO1 was sensitive even at the highest dilution.

610

611 **Figure 2: Schematic representation of the Biofilm Inhibition Assay (BIA).** This assay is  
612 performed to determine if phages are useful in preventing biofilm formation. It starts with  
613 streaking the target strain on an LB agar plate. After an overnight culture a 1:100 dilution  
614 is made and inoculated in polyvinylchloride (PVC) plates along with phages at different  
615 multiplicities of infection (10, 20, 40 and 80). After an incubation period of 10 h, crystal  
616 violet is added to the plate and it is then washed with ethanol and transferred to a  
617 microtiter plate and the optical density is measured at 600 nm. The lethal dose of 50 (LD<sub>50</sub>)  
618 is recorded as the biofilm inhibition.

619

620 **Figure 3: Microtiter plate in the biofilm inhibition assay:** The phages were tested at MOIs  
621 of 10, 20, 40 and 80 for their ability to prevent initiation of *P. aeruginosa* biofilms. The  
622 biofilms were scored using crystal violet (CV) at an OD of 600 nm. The intensity of the color  
623 observed is proportional to the ineffectiveness of phage against biofilm initiation. In this  
624 picture, the five rows exhibit five different strains tested with phage, P140. Some of the  
625 strains required a low MOI of 10 for inhibition, eg. Row 2, whereas certain bacterial strains  
626 required higher MOIs, eg. Row 5.

627

628 **Figure 4: Flowchart for the biofilm eradication assay.** The five-day assay begins with  
629 streaking the target strain on an LB agar plate. A day later an overnight culture is

630 prepared which is diluted the following day 1:30 and inoculated in the CBD plate. A  
631 challenge plate is made on Day 3 with the appropriate phages and the cation-adjusted  
632 Mueller Hinton Broth (CAMHB). After an incubation period of 24 h, the (MIC) Minimum  
633 Inhibition Concentration (MIC) was measured at an  $OD_{600}$ . The pegged lid is then  
634 sonicated to dislodge any surviving biofilm cells and incubated for an additional day. The  
635 minimum biofilm eradication concentration (MBEC) is measured.

636

637 **Figure 5: Biofilm inhibition assay with different MOIs.** When lower MOIs were used some  
638 strains were sensitive, e.g. 1698, with P134 whereas some strains were resistant even at the  
639 highest MOI of 5, e.g. 1704, with P134.

640

641 **Figure 6: Biofilm inhibition assay showing the  $LD_{50}$  values.** When the MOI was increased  
642 from 10 to 80 all the strains turned out to be sensitive. However, some required only an  
643 MOI of 10, e.g. 1653, with P105 while some required a very high MOI of 80. The  $LD_{50}$  values  
644 varied with the strains as indicated by the arrows.

645

646 **Figure 7: MIC and MBEC of 1653 plotted against MOI.** The MOI required for MIC, that is the  
647 concentration of phage required to prevent recolonization of planktonic bacteria from  
648 the biofilms is only a 100. However, the MBEC the concentration of phage required for  
649 eradication of mature biofilm is 200.

650

651  
652

## LITERATURE CITED

- 653 1. **Jung R, Fish DN, Obritsch MD, MacLaren R.** Surveillance of multi-drug  
654 resistant *Pseudomonas aeruginosa* in an urban tertiary-care teaching  
655 hospital. *J Hosp Infect* 2004;57;105-111.
- 656 2. **Shannon KP, French GL.** Increasing resistance to antimicrobial agents of  
657 Gram-negative organisms isolated at a London teaching hospital, 1995-  
658 2000. *J Antimicrob Chemother* 2004;53;818-825.
- 659 3. **Fanconi G, Uehlinger E, Knauer C.** Das zöliakie-syndrom bei angeborener  
660 zystischer pankreasfibromatose und bronchiektasen. *Wien Med*  
661 *Wochenschrp* 1936;86;753-756.
- 662 4. **Blackfan KD, May CD.** Inspissation of secretion, dilatation of the ducts and  
663 acini, atrophy and fibrosis of the pancreas in infants. *The Journal of*  
664 *Pediatrics* 1938;13;627-634.
- 665 5. **Andersen DH.** Cystic fibrosis of the pancreas. *J Chronic Dis* 1958;7;58-90.
- 666 6. CFF, *Cystic Fibrosis Foundation Patient Registry. 2016 Annual Data Report.*  
667 2017, Cystic Fibrosis Foundation: Bethesda, Maryland. p. 94.
- 668 7. **Kartner N, Hanrahan JW, Jensen TJ, Naismith AL, Sun SZ, Ackerley CA, Reyes**  
669 **EF, Tsui LC, Rommens JM, Bear CE, et al.** Expression of the cystic fibrosis gene  
670 in non-epithelial invertebrate cells produces a regulated anion  
671 conductance. *Cell* 1991;64;681-691.
- 672 8. **Wainwright BJ, Scambler PJ, Schmidtke J, Watson EA, Law HY, Farrall M,**  
673 **Cooke HJ, Eiberg H, Williamson R.** Localization of cystic fibrosis locus to  
674 human chromosome 7cen-q22. *Nature* 1985;318;384-385.
- 675 9. **Riordan JR, Rommens JM, Kerem B, Alon N, Rozmahel R, Grzelczak Z,**  
676 **Zielenski J, Lok S, Plavsic N, Chou JL, et al.** Identification of the cystic fibrosis  
677 gene: cloning and characterization of complementary DNA. *Science*  
678 1989;245;1066-1073.
- 679 10. **Bear CE, Duguay F, Naismith AL, Kartner N, Hanrahan JW, Riordan JR.** Cl-  
680 channel activity in *Xenopus* oocytes expressing the cystic fibrosis gene. *J*  
681 *Biol Chem* 1991;266;19142-19145.
- 682 11. **Pier GB, Grout M, Zaidi TS, Olsen JC, Johnson LG, Yankaskas JR, Goldberg**  
683 **JB.** Role of mutant CFTR in hypersusceptibility of cystic fibrosis patients to  
684 lung infections. *Science* 1996;271;64-67.
- 685 12. **Wine JJ.** Basic aspects of cystic fibrosis. *Clin Rev Allergy* 1991;9;1-28.
- 686 13. **Hoiby N.** *Pseudomonas aeruginosa* infection in cystic fibrosis. Diagnostic  
687 and prognostic significance of *Pseudomonas aeruginosa* precipitins  
688 determined by means of crossed immunoelectrophoresis. A survey. *Acta*  
689 *Pathol Microbiol Scand Suppl* 1977;1-96.
- 690 14. **Petersen NT, Hoiby N, Mordhorst CH, Lind K, Flensburg EW, Bruun B.**  
691 Respiratory infections in cystic fibrosis patients caused by virus, chlamydia

- 692 and mycoplasma--possible synergism with *Pseudomonas aeruginosa*. *Acta*  
693 *Paediatr Scand* 1981;70;623-628.
- 694 15. **Hordvik NL, Konig P, Hamory B, Cooperstock M, Kreutz C, Gayer D, Barbero**  
695 **G.** Effects of acute viral respiratory tract infections in patients with cystic  
696 fibrosis. *Pediatr Pulmonol* 1989;7;217-222.
- 697 16. **Conway SP, Simmonds EJ, Littlewood JM.** Acute severe deterioration in  
698 cystic fibrosis associated with influenza A virus infection. *Thorax* 1992;47;112-  
699 114.
- 700 17. **Frederiksen B, Lang S, Koch C, Hoiby N.** Improved survival in the Danish  
701 center-treated cystic fibrosis patients: results of aggressive treatment.  
702 *Pediatr Pulmonol* 1996;21;153-158.
- 703 18. **Govan JR, Brown PH, Maddison J, Doherty CJ, Nelson JW, Dodd M, Greening**  
704 **AP, Webb AK.** Evidence for transmission of *Pseudomonas cepacia* by social  
705 contact in cystic fibrosis. *Lancet* 1993;342;15-19.
- 706 19. **Coenye T, Liu L, Vandamme P, LiPuma JJ.** Identification of *Pandora*  
707 species by 16S ribosomal DNA-based PCR assays. *J Clin Microbiol*  
708 2001;39;4452-4455.
- 709 20. **Szaff M, Hoiby N.** Antibiotic treatment of *Staphylococcus aureus* infection  
710 in cystic fibrosis. *Acta Paediatr Scand* 1982;71;821-826.
- 711 21. **Jensen T, Pedersen SS, Stafanger G, Hoiby N, Koch C, Bondesson G.**  
712 Comparison of amoxicillin/clavulanate with amoxicillin in children and  
713 adults with chronic obstructive pulmonary disease and infection with  
714 *Haemophilus influenzae*. *Scand J Infect Dis* 1988;20;517-524.
- 715 22. **Root RK.** (1999). Clinical infectious diseases : a practical approach. New  
716 York: Oxford University Press. xxi, 1013 p.
- 717 23. **Pedersen SS, Hoiby N, Espersen F, Koch C.** Role of alginate in infection with  
718 mucoid *Pseudomonas aeruginosa* in cystic fibrosis. *Thorax* 1992;47;6-13.
- 719 24. **Evans LR, Linker A.** Production and characterization of the slime  
720 polysaccharide of *Pseudomonas aeruginosa*. *J Bacteriol* 1973;116;915-924.
- 721 25. **Mathee K, Ciofu O, Sternberg C, Lindum PW, Campbell JI, Jensen P, Johnsen**  
722 **AH, Givskov M, Ohman DE, Molin S, et al.** Mucoid conversion of  
723 *Pseudomonas aeruginosa* by hydrogen peroxide: a mechanism for  
724 virulence activation in the cystic fibrosis lung. *Microbiology* 1999;145;1349-  
725 1357.
- 726 26. **Stapper AP, Narasimhan G, Ohman DE, Barakat J, Hentzer M, Molin S,**  
727 **Kharazmi A, Hoiby N, Mathee K.** Alginate production affects *Pseudomonas*  
728 *aeruginosa* biofilm development and architecture, but is not essential for  
729 biofilm formation. *J Med Microbiol* 2004;53;679-690.
- 730 27. **Costerton JW, Cheng KJ, Geesey GG, Ladd TI, Nickel JC, Dasgupta M,**  
731 **Marrie TJ.** Bacterial biofilms in nature and disease. *Annu Rev Microbiol*  
732 1987;41;435-464.
- 733 28. **Donlan RM, Costerton JW.** Biofilms: survival mechanisms of clinically relevant  
734 microorganisms. *Clin Microbiol Rev* 2002;15;167-193.

- 735 29. **Hoiby N.** Understanding bacterial biofilms in patients with cystic fibrosis:  
736 current and innovative approaches to potential therapies. *J Cyst Fibros*  
737 2002;1;249-254.
- 738 30. **Costerton JW, Lewandowski Z, Caldwell DE, Korber DR, Lappin-Scott HM.**  
739 Microbial biofilms. *Annu Rev Microbiol* 1995;49;711-745.
- 740 31. **Jensen T, Pedersen SS, Garne S, Heilmann C, Hoiby N, Koch C.** Colistin  
741 inhalation therapy in cystic fibrosis patients with chronic *Pseudomonas*  
742 *aeruginosa* lung infection. *J Antimicrob Chemother* 1987;19;831-838.
- 743 32. **Valerius NH, Koch C, Hoiby N.** Prevention of chronic *Pseudomonas*  
744 *aeruginosa* colonisation in cystic fibrosis by early treatment. *Lancet*  
745 1991;338;725-726.
- 746 33. **Saiman L, Mehar F, Niu WW, Neu HC, Shaw KJ, Miller G, Prince A.** Antibiotic  
747 susceptibility of multiply resistant *Pseudomonas aeruginosa* isolated from  
748 patients with cystic fibrosis, including candidates for transplantation. *Clin*  
749 *Infect Dis* 1996;23;532-537.
- 750 34. **Moss RB, Babin S, Hsu YP, Blessing-Moore J, Lewiston NJ.** Allergy to  
751 semisynthetic penicillins in cystic fibrosis. *J Pediatr* 1984;104;460-466.
- 752 35. **Jensen T, Pedersen SS, Hoiby N, Koch C.** Safety of aztreonam in patients  
753 with cystic fibrosis and allergy to beta-lactam antibiotics. *Rev Infect Dis*  
754 1991;13;S594-597.
- 755 36. **Koch C, Hjelt K, Pedersen SS, Jensen ET, Jensen T, Lanng S, Valerius NH,**  
756 **Pedersen M, Hoiby N.** Retrospective clinical study of hypersensitivity  
757 reactions to aztreonam and six other beta-lactam antibiotics in cystic  
758 fibrosis patients receiving multiple treatment courses. *Rev Infect Dis*  
759 1991;13;S608-611.
- 760 37. **Moss RB.** Drug allergy in cystic fibrosis. *Clin Rev Allergy* 1991;9;211-229.
- 761 38. **Godfrey AJ, Bryan LE, Rabin HR.** Beta-Lactam-resistant *Pseudomonas*  
762 *aeruginosa* with modified penicillin-binding proteins emerging during cystic  
763 fibrosis treatment. *Antimicrob Agents Chemother* 1981;19;705-711.
- 764 39. **Pedersen SS, Koch C, Hoiby N, Rosendal K.** An epidemic spread of  
765 multiresistant *Pseudomonas aeruginosa* in a cystic fibrosis centre. *J*  
766 *Antimicrob Chemother* 1986;17;505-516.
- 767 40. **Pedersen SS, Pressler T, Jensen T, Rosdahl VT, Bentzon MW, Hoiby N, Koch C.**  
768 Combined imipenem/cilastatin and tobramycin therapy of multiresistant  
769 *Pseudomonas aeruginosa* in cystic fibrosis. *J Antimicrob Chemother*  
770 1987;19;101-107.
- 771 41. **Dostal RE, Seale JP, Yan BJ.** Resistance to ciprofloxacin of respiratory  
772 pathogens in patients with cystic fibrosis. *Med J Aust* 1992;156;20-24.
- 773 42. **Giwerzman B, Meyer C, Lambert PA, Reinert C, Hoiby N.** High-level beta-  
774 lactamase activity in sputum samples from cystic fibrosis patients during  
775 antipseudomonal treatment. *Antimicrob Agents Chemother* 1992;36;71-76.
- 776 43. **Costerton JW, Stewart PS, Greenberg EP.** Bacterial biofilms: a common  
777 cause of persistent infections. *Science* 1999;284;1318-1322.

- 778 44. **Angus BL, Carey AM, Caron DA, Kropinski AM, Hancock RE.** Outer  
779 membrane permeability in *Pseudomonas aeruginosa*: comparison of a  
780 wild-type with an antibiotic-supersusceptible mutant. *Antimicrob Agents*  
781 *Chemother* 1982;21:299-309.
- 782 45. **Nikaido H.** Outer membrane barrier as a mechanism of antimicrobial  
783 resistance. *Antimicrob Agents Chemother* 1989;33:1831-1836.
- 784 46. **Ghuysen JM, Charlier P, Coyette J, Duez C, Fonze E, Fraipont C, Goffin C,**  
785 **Joris B, Nguyen-Disteche M.** Penicillin and beyond: evolution, protein fold,  
786 multimodular polypeptides, and multiprotein complexes. *Microb Drug*  
787 *Resist* 1996;2:163-175.
- 788 47. **Brown MR, Williams P.** Influence of substrate limitation and growth phase  
789 on sensitivity to antimicrobial agents. *J Antimicrob Chemother* 1985;15  
790 Suppl A;7-14.
- 791 48. **Cozens RM, Tuomanen E, Tosch W, Zak O, Suter J, Tomasz A.** Evaluation of  
792 the bactericidal activity of beta-lactam antibiotics on slowly growing  
793 bacteria cultured in the chemostat. *Antimicrob Agents Chemother*  
794 1986;29:797-802.
- 795 49. **Evans DJ, Allison DG, Brown MR, Gilbert P.** Effect of growth-rate on  
796 resistance of Gram-negative biofilms to ceftrimide. *J Antimicrob Chemother*  
797 1990;26:473-478.
- 798 50. **Sauer K, Camper AK, Ehrlich GD, Costerton JW, Davies DG.** *Pseudomonas*  
799 *aeruginosa* displays multiple phenotypes during development as a biofilm.  
800 *J Bacteriol* 2002;184:1140-1154.
- 801 51. **Poole K, Krebs K, McNally C, Neshat S.** Multiple antibiotic resistance in  
802 *Pseudomonas aeruginosa*: evidence for involvement of an efflux operon. *J*  
803 *Bacteriol* 1993;175:7363-7372.
- 804 52. **Li XZ, Ma D, Livermore DM, Nikaido H.** Role of efflux pump(s) in intrinsic  
805 resistance of *Pseudomonas aeruginosa*: active efflux as a contributing  
806 factor to beta-lactam resistance. *Antimicrob Agents Chemother*  
807 1994;38:1742-1752.
- 808 53. **Morshed SR, Lei Y, Yoneyama H, Nakae T.** Expression of genes associated  
809 with antibiotic extrusion in *Pseudomonas aeruginosa*. *Biochem Biophys Res*  
810 *Commun* 1995;210:356-362.
- 811 54. **Poole K, Gotoh N, Tsujimoto H, Zhao Q, Wada A, Yamasaki T, Neshat S,**  
812 **Yamagishi J, Li XZ, Nishino T.** Overexpression of the *mexC-mexD-oprJ* efflux  
813 operon in *nfxB*-type multidrug-resistant strains of *Pseudomonas aeruginosa*.  
814 *Mol Microbiol* 1996;21:713-724.
- 815 55. **Kohler T, Michea-Hamzehpour M, Henze U, Gotoh N, Curty LK, Pechere JC.**  
816 Characterization of MexE-MexF-OprN, a positively regulated multidrug  
817 efflux system of *Pseudomonas aeruginosa*. *Mol Microbiol* 1997;23:345-354.
- 818 56. **Johansen HK, Cryz SJ, Jr., Hoiby N.** Clearance of *Pseudomonas aeruginosa*  
819 from normal rat lungs after immunization with somatic antigens or toxin A.  
820 *APMIS* 1994;102:545-553.



- 821 57. **Johansen HK, Espersen F, Cryz SJ, Jr., Hougen HP, Fomsgaard A, Rygaard J,**  
822 **Hoiby N.** Immunization with *Pseudomonas aeruginosa* vaccines and  
823 adjuvant can modulate the type of inflammatory response subsequent to  
824 infection. *Infect Immun* 1994;62:3146-3155.
- 825 58. **Johansen HK, Hougen HP, Cryz SJ, Jr., Rygaard J, Hoiby N.** Vaccination  
826 promotes TH1-like inflammation and survival in chronic *Pseudomonas*  
827 *aeruginosa* pneumonia in rats. *Am J Respir Crit Care Med* 1995;152:1337-  
828 1346.
- 829 59. **Johansen HK, Hougen HP, Rygaard J, Hoiby N.** Interferon-gamma (IFN-  
830 gamma) treatment decreases the inflammatory response in chronic  
831 *Pseudomonas aeruginosa* pneumonia in rats. *Clin Exp Immunol*  
832 1996;103:212-218.
- 833 60. **Song Z, Johansen HK, Moser C, Hoiby N.** Effects of Chinese medicinal herbs  
834 on a rat model of chronic *Pseudomonas aeruginosa* lung infection. *APMIS*  
835 1996;104:350-354.
- 836 61. **Song Z, Wu H, Mathee K, Hoiby N, Kharazmi A.** Gerimax ginseng regulates  
837 both humoral and cellular immunity during chronic *Pseudomonas*  
838 *aeruginosa* lung infection. *J Altern Complement Med* 2002;8:459-466.
- 839 62. **Song Z, Moser C, Wu H, Faber V, Kharazmi A, Hoiby N.** Cytokine modulating  
840 effect of ginseng treatment in a mouse model of *Pseudomonas aeruginosa*  
841 lung infection. *J Cyst Fibros* 2003;2:112-119.
- 842 63. **Rasmussen TB, Bjarnsholt T, Skindersoe ME, Hentzer M, Kristoffersen P, Kote**  
843 **M, Nielsen J, Eberl L, Givskov M.** Screening for quorum-sensing inhibitors  
844 (QSI) by use of a novel genetic system, the QSI selector. *J Bacteriol*  
845 2005;187:1799-1814.
- 846 64. **Springfield EP, Amabeoku G, Weitz F, Mabusela W, Johnson Q.** An  
847 assessment of two *Carpobrotus* species extracts as potential antimicrobial  
848 agents. *Phytomedicine* 2003;10:434-439.
- 849 65. **Pereira RS, Sumita TC, Furlan MR, Jorge AO, Ueno M.** [Antibacterial activity  
850 of essential oils on microorganisms isolated from urinary tract infection]. *Rev*  
851 *Saude Publica* 2004;38:326-328.
- 852 66. **Zaidi MA, Crow SA, Jr.** Biologically active traditional medicinal herbs from  
853 Balochistan, Pakistan. *J Ethnopharmacol* 2005;96:331-334.
- 854 67. **Al-Waili NS.** Investigating the antimicrobial activity of natural honey and its  
855 effects on the pathogenic bacterial infections of surgical wounds and  
856 conjunctiva. *J Med Food* 2004;7:210-222.
- 857 68. **Al-Waili NS, Haq A.** Effect of honey on antibody production against thymus-  
858 dependent and thymus-independent antigens in primary and secondary  
859 immune responses. *J Med Food* 2004;7:491-494.
- 860 69. **Summers WC.** On the origins of the science in Arrowsmith: Paul de Kruif,  
861 Felix d'Herelle, and phage. *J Hist Med Allied Sci* 1991;46:315-332.
- 862 70. **Carlton RM.** Phage therapy: past history and future prospects. *Arch*  
863 *Immunol Ther Exp (Warsz)* 1999;47:267-274.

- 864 71. **Ciuca M, Popovici M, Nestorescu N, Andreescu V, Georgescu C, Soare L,**  
865 **Dragoi T, Fessler N.** [Research on Some Genetic Aspects of the Biological  
866 Evolution of "Lytic" and "Lysogenic" Enteric Bacteriophages]. *Stud Cercet*  
867 *Inframicrobiol* 1963;14:545-550.
- 868 72. **Bertani G.** Lysogenic versus lytic cycle of phage multiplication. *Cold Spring*  
869 *Harb Symp Quant Biol* 1953;18:65-70.
- 870 73. **Smith HW, Huggins MB.** Effectiveness of phages in treating experimental  
871 *Escherichia coli* diarrhoea in calves, piglets and lambs. *J Gen Microbiol*  
872 1983;129:2659-2675.
- 873 74. **Smith HW, Huggins MB.** Successful treatment of experimental *Escherichia*  
874 *coli* infections in mice using phage: its general superiority over antibiotics. *J*  
875 *Gen Microbiol* 1982;128:307-318.
- 876 75. **Peitzman SJ.** Felix d'Herelle and bacteriophage therapy. *Trans Stud Coll*  
877 *Physicians Phila* 1969;37:115-123.
- 878 76. **Ojeniyi B, Birch-Andersen A, Mansa B, Rosdahl VT, Hoiby N.** Morphology of  
879 *Pseudomonas aeruginosa* phages from the sputum of cystic fibrosis patients  
880 and from the phage typing set. An electron microscopy study. *APMIS*  
881 1991;99:925-930.
- 882 77. **Kucharewicz-Krukowska A, Slopek S.** Immunogenic effect of  
883 bacteriophage in patients subjected to phage therapy. *Arch Immunol Ther*  
884 *Exp (Warsz)* 1987;35:553-561.
- 885 78. **Mathur MD, Vidhani S, Mehndiratta PL.** Bacteriophage therapy: an  
886 alternative to conventional antibiotics. *J Assoc Physicians India*  
887 2003;51:593-596.
- 888 79. **Slopek S, Durlakowa I, Weber-Dabrowska B, Kucharewicz-Krukowska A,**  
889 **Dabrowski M, Bisikiewicz R.** Results of bacteriophage treatment of  
890 suppurative bacterial infections. I. General evaluation of the results. *Arch*  
891 *Immunol Ther Exp (Warsz)* 1983;31:267-291.
- 892 80. **Meiert E, Petrovici M, Sima F, Costache G, Savulian C.** Investigation on the  
893 therapeutical efficiency of some adapted bacteriophages in experimental  
894 infection with *Pseudomonas aeruginosa*. *Arch Roum Pathol Exp Microbiol*  
895 1987;46:17-26.
- 896 81. **Soothill JS.** Bacteriophage prevents destruction of skin grafts by  
897 *Pseudomonas aeruginosa*. *Burns* 1994;20:209-211.
- 898 82. **Ahmad SI.** Treatment of post-burns bacterial infections by bacteriophages,  
899 specifically ubiquitous *Pseudomonas* spp. notoriously resistant to antibiotics.  
900 *Med Hypotheses* 2002;58:327-331.
- 901 83. **Poul MA, Marks JD.** Targeted gene delivery to mammalian cells by  
902 filamentous bacteriophage. *J Mol Biol* 1999;288:203-211.
- 903 84. **March JB, Clark JR, Jepson CD.** Genetic immunisation against hepatitis B  
904 using whole bacteriophage lambda particles. *Vaccine* 2004;22:1666-1671.
- 905 85. **Gorski A, Nowaczyk M, Weber-Dabrowska B, Kniotek M, Boratynski J,**  
906 **Ahmed A, Dabrowska K, Wierzbicki P, Switala-Jelen K, Opolski A.** New

- 907 insights into the possible role of bacteriophages in transplantation.  
908 *Transplant Proc* 2003;35;2372-2373.
- 909 86. **Kiewitz C, Tummeler B.** Sequence diversity of *Pseudomonas aeruginosa*:  
910 impact on population structure and genome evolution. *J Bacteriol*  
911 2000;182;3125-3135.
- 912 87. **Kong KF, Jayawardena SR, Indulkar SD, Del Puerto A, Koh CL, Hoiby N,**  
913 **Mathee K.** *Pseudomonas aeruginosa* AmpR is a global transcriptional  
914 factor that regulates expression of AmpC and PoxB beta-lactamases,  
915 proteases, quorum sensing, and other virulence factors. *Antimicrob Agents*  
916 *Chemother* 2005;49;4567-4575.
- 917 88. **Mah TF, O'Toole GA.** Mechanisms of biofilm resistance to antimicrobial  
918 agents. *Trends Microbiol* 2001;9;34-39.
- 919 89. **O'Toole GA, Kolter R.** Initiation of biofilm formation in *Pseudomonas*  
920 *fluorescens* WCS365 proceeds via multiple, convergent signalling  
921 pathways: a genetic analysis. *Mol Microbiol* 1998;28;449-461.
- 922 90. **Ceri H, Olson ME, Stremick C, Read RR, Morck D, Buret A.** The Calgary Biofilm  
923 Device: new technology for rapid determination of antibiotic  
924 susceptibilities of bacterial biofilms. *J Clin Microbiol* 1999;37;1771-1776.
- 925 91. **Kudva IT, Jelacic S, Tarr PI, Youderian P, Hovde CJ.** Biocontrol of *Escherichia*  
926 *coli* O157 with O157-specific bacteriophages. *Appl Environ Microbiol*  
927 1999;65;3767-3773.
- 928 92. **Biswas B, Adhya S, Washart P, Paul B, Trostel AN, Powell B, Carlton R, Merrill**  
929 **CR.** Bacteriophage therapy rescues mice bacteremic from a clinical  
930 isolate of vancomycin-resistant *Enterococcus faecium*. *Infect Immun*  
931 2002;70;204-210.
- 932 93. **Broxmeyer L, Sosnowska D, Miltner E, Chacon O, Wagner D, McGarvey J,**  
933 **Barletta RG, Bermudez LE.** Killing of *Mycobacterium avium* and  
934 *Mycobacterium tuberculosis* by a mycobacteriophage delivered by a  
935 nonvirulent mycobacterium: a model for phage therapy of intracellular  
936 bacterial pathogens. *J Infect Dis* 2002;186;1155-1160.
- 937 94. **Cerveny KE, DePaola A, Duckworth DH, Gulig PA.** Phage therapy of local  
938 and systemic disease caused by *Vibrio vulnificus* in iron-dextran-treated  
939 mice. *Infect Immun* 2002;70;6251-6262.
- 940 95. **Mah TF, Pitts B, Pellock B, Walker GC, Stewart PS, O'Toole GA.** A genetic  
941 basis for *Pseudomonas aeruginosa* biofilm antibiotic resistance. *Nature*  
942 2003;426;306-310.
- 943 96. **Romling U, Greipel J, Tummeler B.** Gradient of genomic diversity in the  
944 *Pseudomonas aeruginosa* chromosome. *Mol Microbiol* 1995;17;323-332.
- 945 97. **Soothill J, Hawkins C, Anggard E, Harper D.** Therapeutic use of  
946 bacteriophages. *Lancet Infect Dis* 2004;4;544-545.
- 947 98. **Park SC, Nakai T.** Bacteriophage control of *Pseudomonas plecoglossicida*  
948 infection in ayu *Plecoglossus altivelis*. *Dis Aquat Organ* 2003;53;33-39.

- 949 99. **Smith HW, Huggins MB, Shaw KM.** Factors influencing the survival and  
950 multiplication of bacteriophages in calves and in their environment. *J Gen*  
951 *Microbiol* 1987;133;1127-1135.
- 952 100. **Hagens S, Habel A, von Ahsen U, von Gabain A, Blasi U.** Therapy of  
953 experimental pseudomonas infections with a nonreplicating genetically  
954 modified phage. *Antimicrob Agents Chemother* 2004;48;3817-3822.
- 955 101. **Fick RB, Jr., Sonoda F, Hornick DB.** Emergence and persistence of  
956 *Pseudomonas aeruginosa* in the cystic fibrosis airway. *Semin Respir Infect*  
957 1992;7;168-178.
- 958 102. **Doggett RG, Harrison GM, Stillwell RN, Wallis ES.** An atypical *Pseudomonas*  
959 *aeruginosa* associated with cystic fibrosis of the pancreas. *J Pediatr*  
960 1966;68;215-221.
- 961 103. **Baltimore RS, Mitchell M.** Immunologic investigations of mucoid strains of  
962 *Pseudomonas aeruginosa*: comparison of susceptibility to opsonic  
963 antibody in mucoid and nonmucoid strains. *J Infect Dis* 1980;141;238-247.
- 964 104. **Lam J, Chan R, Lam K, Costerton JW.** Production of mucoid microcolonies  
965 by *Pseudomonas aeruginosa* within infected lungs in cystic fibrosis. *Infect*  
966 *Immun* 1980;28;546-556.
- 967 105. **Boucher JC, Yu H, Mudd MH, Deretic V.** Mucoid *Pseudomonas aeruginosa*  
968 in cystic fibrosis: characterization of muc mutations in clinical isolates and  
969 analysis of clearance in a mouse model of respiratory infection. *Infect*  
970 *Immun* 1997;65;3838-3846.
- 971 106. **Hanlon GW, Denyer SP, Olliff CJ, Ibrahim LJ.** Reduction in  
972 exopolysaccharide viscosity as an aid to bacteriophage penetration  
973 through *Pseudomonas aeruginosa* biofilms. *Appl Environ Microbiol*  
974 2001;67;2746-2753.
- 975 107. **Head NE, Yu H.** Cross-sectional analysis of clinical and environmental  
976 isolates of *Pseudomonas aeruginosa*: biofilm formation, virulence, and  
977 genome diversity. *Infect Immun* 2004;72;133-144.
- 978 108. **Morck DW, Lam K, McKay SG, Olson ME, Prosser B, Ellis BD, Cleeland R,**  
979 **Costerton JW.** Comparative evaluation of fleroxacin, ampicillin,  
980 trimethoprim-sulfamethoxazole, and gentamicin as treatments of catheter-  
981 associated urinary tract infection in a rabbit model. *Int J Antimicrob Agents*  
982 1994;4 Suppl 2;S21-27.
- 983 109. **Gorman SP, McGovern JG, Woolfson AD, Adair CG, Jones DS.** The  
984 concomitant development of poly(vinyl chloride)-related biofilm and  
985 antimicrobial resistance in relation to ventilator-associated pneumonia.  
986 *Biomaterials* 2001;22;2741-2747.
- 987 110. **Sepandj F, Ceri H, Gibb A, Read R, Olson M.** Minimum inhibitory  
988 concentration (MIC) versus minimum biofilm eliminating concentration  
989 (MBEC) in evaluation of antibiotic sensitivity of Gram-negative bacilli  
990 causing peritonitis. *Perit Dial Int* 2004;24;65-67.

- 991 111. **Huff WE, Huff GR, Rath NC, Balog JM, Xie H, Moore PA, Jr., Donoghue AM.**  
992 Prevention of *Escherichia coli* respiratory infection in broiler chickens with  
993 bacteriophage (SPR02). *Poult Sci* 2002;81;437-441.
- 994 112. **Huff WE, Huff GR, Rath NC, Balog JM, Donoghue AM.** Bacteriophage  
995 treatment of a severe *Escherichia coli* respiratory infection in broiler  
996 chickens. *Avian Dis* 2003;47;1399-1405.
- 997 113. **Slopek S, Weber-Dabrowska B, Dabrowski M, Kucharewicz-Krukowska A.**  
998 Results of bacteriophage treatment of suppurative bacterial infections in  
999 the years 1981-1986. *Arch Immunol Ther Exp (Warsz)* 1987;35;569-583.
- 1000 114. **Aslanov BI, Iafaev R, Zueva LP.** [Mode of the rational use of *Pseudomonas*  
1001 *aeruginosa* bacteriophages in therapeutic and epidemic control  
1002 practice]. *Zh Mikrobiol Epidemiol Immunobiol* 2003;72-76.
- 1003 115. **Faruque SM, Naser IB, Islam MJ, Faruque AS, Ghosh AN, Nair GB, Sack DA,**  
1004 **Mekalanos JJ.** Seasonal epidemics of cholera inversely correlate with the  
1005 prevalence of environmental cholera phages. *Proc Natl Acad Sci U S A*  
1006 2005;102;1702-1707.
- 1007 116. **Wills QF, Kerrigan C, Soothill JS.** Experimental bacteriophage protection  
1008 against *Staphylococcus aureus* abscesses in a rabbit model. *Antimicrob*  
1009 *Agents Chemother* 2005;49;1220-1221.

**Table 1:** Recent uses of phages against pathogenic bacteria.

| Source/Model organism                  | Bacteria Treated       | References                     |
|----------------------------------------|------------------------|--------------------------------|
| Meat                                   | <i>E. coli</i>         | (Dykes and Moorhead 2002)      |
| Eggs                                   | <i>Salmonella spp.</i> | (Goode <i>et al.</i> , 2003)   |
| Cheese                                 | <i>Listeria</i>        | (Modi <i>et al.</i> , 2001)    |
| Skin grafts in humans                  | <i>P. aeruginosa</i>   | (Soothill 1994)                |
| Chronic pulmonary infection in chicken | <i>P. aeruginosa</i>   | (Meitert <i>et al.</i> , 1987) |
| Burn wound in humans                   | <i>P. aeruginosa</i>   | (Ahmad 2002)                   |

**Table 2.** Bacterial strains, plasmids and primers used in this study.

| KGN No | Strain name | Genotype/Source                                                        | Reference                                                      |
|--------|-------------|------------------------------------------------------------------------|----------------------------------------------------------------|
| 236    | PAO1        | Wild-type                                                              | (Holloway and Morgan, 1986)                                    |
| 944    | PDO300      | PAO <i>mucA22</i>                                                      | (Mathee <i>et al.</i> , 1999)                                  |
| 1636   | 892         | <i>poxB1</i> ; CF sputum, Hannover, Germany, 1983                      | (Kiewitz and Tummler, 2000; Spangenberg <i>et al.</i> , 1998)  |
| 1637   | K9          | <i>poxB2</i> ; CF sputum, Husum, Germany, 1985                         | (Kiewitz and Tummler, 2000; Spangenberg <i>et al.</i> , 1998)  |
| 1638   | G7          | <i>poxB3</i> ; CF sputum, Stade, Germany, 1986                         | (Kiewitz and Tummler, 2000; Spangenberg <i>et al.</i> , 1998)  |
| 1639   | SG1         | CF throat swab, Buckeburg, Germany, 1986                               | (Kiewitz and Tummler, 2000; Spangenberg <i>et al.</i> , 1998)  |
| 1640   | SG31        | <i>poxB4</i> ; River, Mulheim, Germany, 1993                           | (Kiewitz and Tummler, 2000; Spangenberg <i>et al.</i> , 1998)  |
| 1641   | DM          | <i>poxB5</i> , Alg <sup>+</sup> ; CF sputum, Hamburg, Germany, 1984    | (Kiewitz and Tummler, 2000), Spangenberg <i>et al.</i> , 1998) |
| 1642   | HJ2         | Sputum isolate, Cologne, Germany, 1990                                 | (Kiewitz and Tummler, 2000; Spangenberg <i>et al.</i> , 1998)  |
| 63741  | 1643        | <i>poxB6</i> ; bum wound, intensive care unit, Hannover, Germany, 1990 | (Kiewitz and Tummler, 2000; Spangenberg <i>et al.</i> , 1998)  |
| 1644   | DSM 1128    | <i>poxB7</i> ; Ear infection, United States, 1980                      | (Kiewitz and Tummler, 2000; Spangenberg <i>et al.</i> , 1998)  |
| 1645   | ATCC 10145  | <i>poxB9</i> ; Neotype, type strain, Prague, Czech Republic, <1960     | (Kiewitz and Tummler, 2000; Spangenberg <i>et al.</i> , 1998)  |
| 1646   | ATCC 15691  | <i>poxB8</i> ; PAT, wound, Melbourne, Australia, 1952                  | (Kiewitz and Tummler, 2000; Spangenberg <i>et al.</i> , 1998)  |
| 1647   | ATCC 33356  | International serotype 9, human feces, Heidelberg, Germany 1955        | (Kiewitz and Tummler, 2000; Spangenberg <i>et al.</i> , 1998)  |
| 1648   | ATCC 33818  | <i>poxB10</i> ; Mushroom <i>Agaricus bisporus</i>                      | (Kiewitz and Tummler, 2000; Spangenberg <i>et al.</i> , 1998)  |
| 1649   | ATCC 21776  | Soil, Japan                                                            | (Kiewitz and Tummler, 2000; Spangenberg <i>et al.</i> , 1998)  |
| 1650   | H2          | <i>poxB11</i> ; Catheter, ward for infectious disease                  | (Kiewitz and Tummler, 2000; Spangenberg <i>et al.</i> , 1998)  |
| 1652   | PAK         |                                                                        | (Bradley, 1974)                                                |
| 1653   | ZW 30       | CF throat swab, Innsbruck, Austria, 1997                               | (Kong <i>et al.</i> , 2005)                                    |
| 1654   | ZW 31       | CF throat swab, Innsbruck, Austria, 1997                               | (Kong <i>et al.</i> , 2005)                                    |
| 1655   | ZW 41       | <i>poxB12</i> ; CF throat swab, Verona, Italy, 1997                    | (Kong <i>et al.</i> , 2005)                                    |
| 1656   | ZW 43       | <i>poxB13</i> ; CF throat swab, Genoa, Italy, 1997                     | (Kong <i>et al.</i> , 2005)                                    |
| 1657   | ZW 49       | <i>poxB14</i> ; CF throat swab, Verona, Italy, 1997                    | (Kong <i>et al.</i> , 2005)                                    |
| 1658   | ZW 54       | CF throat swab, Milano, Italy, 1997                                    | (Kong <i>et al.</i> , 2005)                                    |
| 1659   | ZW 64       | CF throat swab, Lund, Sweden, 1997                                     | (Kong <i>et al.</i> , 2005)                                    |
| 1660   | ZW 77       | <i>poxB15</i> , Alg <sup>+</sup> ; CF throat swab, London, UK, 1997    | (Kong <i>et al.</i> , 2005)                                    |
| 1661   | ZW 79       | CF throat swab, Galway, Ireland, 1997                                  | (Kong <i>et al.</i> , 2005)                                    |
| 1662   | ZW 81       | CF throat swab, London, UK, 1997                                       | (Kong <i>et al.</i> , 2005)                                    |
| 1663   | ZW 83       | <i>poxB16</i> ; CF throat swab, London, UK, 1997                       | (Kong <i>et al.</i> , 2005)                                    |
| 1664   | ZW 85       | CF throat swab, Aberdeen, UK, 1997                                     | (Kong <i>et al.</i> , 2005)                                    |
| 1665   | ZW 88       | <i>poxB17</i> ; CF throat swab, London, UK, 1997                       | (Kong <i>et al.</i> , 2005)                                    |
| 1666   | ZW 92       | <i>poxB18</i> ; CF throat swab, Marseilles, France, 1997               | (Kong <i>et al.</i> , 2005)                                    |
| 1667   | ZW 98       | CF throat swab, The Hague, The Netherlands, 1997                       | (Kong <i>et al.</i> , 2005)                                    |
| 1668   | ZW 102      | CF throat swab, Leuven, Belgium, 1997                                  | (Kong <i>et al.</i> , 2005)                                    |
| 1669   | ZW 113      | CF throat swab, Rotterdam, The Netherlands, 1997                       | (Kong <i>et al.</i> , 2005)                                    |
| 1670   | ZW 117      | CF throat swab, Vienna, Austria, 1997                                  | (Kong <i>et al.</i> , 2005)                                    |
| 1671   | ZW 119      | CF throat swab, Poznan, Poland, 1997                                   | (Kong <i>et al.</i> , 2005)                                    |
| 1672   | BST 1       | <i>poxB19</i> ; CF throat swab, Hannover, Germany, 1985                | (Kong <i>et al.</i> , 2005)                                    |

|      |              |                                                                                     |                     |
|------|--------------|-------------------------------------------------------------------------------------|---------------------|
| 1673 | KB 1         | poxB20; CF throat swab, Sarstedt, Germany, 1985                                     | (Kong et al., 2005) |
| 1674 | MF 6         | poxB21; CF throat swab, Bremen, Germany, 1987                                       | (Kong et al., 2005) |
| 1675 | PD 1         | CF throat swab, Hannover, Germany, 1985                                             | (Kong et al., 2005) |
| 1676 | RN 4         | CF throat swab, Oldenburg, Germany, 1986                                            | (Kong et al., 2005) |
| 1677 | RP 1         | CF throat swab, Hannover, Germany, 1985                                             | (Kong et al., 2005) |
| 1678 | SS 1         | CF throat swab, Lüneburg, Germany, 1985                                             | (Kong et al., 2005) |
| 1679 | A 5670       | Wound, Heidelberg, Germany, 1992                                                    | (Kong et al., 2005) |
| 1680 | A 5803       | Tracheal aspirate, Heidelberg, Germany, 1992                                        | (Kong et al., 2005) |
| 1681 | AL 5846      | Wound, Heidelberg, Germany, 1992                                                    | (Kong et al., 2005) |
| 1682 | 2813 A/92    | CF sputum, Copenhagen, Denmark, 1992                                                | (Kong et al., 2005) |
| 1683 | 2733/92      | CF sputum, Copenhagen, Denmark, 1992                                                | (Kong et al., 2005) |
| 1684 | Va 24437     | CF sputum, Halle, Germany, 1992                                                     | (Kong et al., 2005) |
| 1685 | Va 27260     | CF sputum, Halle, Germany, 1992                                                     | (Kong et al., 2005) |
| 1686 | Va 26232     | CF sputum, Halle, Germany, 1992                                                     | (Kong et al., 2005) |
| 1687 | Gr 2248      | Clinical isolate, Athens, Greece, 1995                                              | (Kong et al., 2005) |
| 1688 | Gr 2052      | Clinical isolate, Athens, Greece, 1995                                              | (Kong et al., 2005) |
| 1689 | Gr 2057      | Clinical isolate, Athens, Greece, 1995                                              | (Kong et al., 2005) |
| 1690 | PT 36        | Water, Mühlheim, Germany, 1992                                                      | (Kong et al., 2005) |
| 1691 | 641 HD 11/m1 | poxB22; Water, Mühlheim, Germany, 1992                                              | (Kong et al., 2005) |
| 1692 | PT 20        | poxB23; Water, Mühlheim, Germany, 1992                                              | (Kong et al., 2005) |
| 1693 | PT 12        | Water, Mühlheim, Germany, 1992                                                      | (Kong et al., 2005) |
| 1694 | PT 22        | Water, Mühlheim, Germany, 1992                                                      | (Kong et al., 2005) |
| 1695 | PT 6         | Water, Mühlheim, Germany, 1992                                                      | (Kong et al., 2005) |
| 1696 | PT 2         | Water, Mühlheim, Germany, 1992                                                      | (Kong et al., 2005) |
| 1697 | ATCC 33348   | <i>Pseudomonas aeruginosa</i> (Schroeter) Migula, serotype 1                        | (Liu et al., 1983)  |
| 1698 | ATCC 33364   | poxB24; <i>Pseudomonas aeruginosa</i> (Schroeter) Migula, serotype 17               | (Liu et al., 1983)  |
| 1699 | ATCC 14886   | <i>Pseudomonas aeruginosa</i> (Schroeter) Migula, soil                              | (Kong et al., 2005) |
| 1700 | ATCC 15522   | poxB25; <i>Pseudomonas aeruginosa</i> (Schroeter) Migula, soil                      | US Patent 3,301,766 |
| 1701 | ATCC 21472   | poxB26; <i>Pseudomonas aeruginosa</i> (Schroeter) Migula, soil from an oil field    | US Patent 3,729,378 |
| 1702 | ATCC 33988   | <i>Pseudomonas aeruginosa</i> (Schroeter) Migula, fuel storage tank, Ponca City, OK | (Kong et al., 2005) |
| 1703 | DSM 939      | Water                                                                               | (Kong et al., 2005) |
| 1704 | DSM 288      | Unknown origin                                                                      | (Kong et al., 2005) |
| 1698 | ATCC 33364   | poxB24; <i>Pseudomonas aeruginosa</i> (Schroeter) Migula, serotype 17               | (Liu et al., 1983)  |
| 1699 | ATCC 14886   | <i>Pseudomonas aeruginosa</i> (Schroeter) Migula, soil                              | (Kong et al., 2005) |
| 1705 | DSM 1253     | poxB27; Unknown origin                                                              | (Kong et al., 2005) |
| 1706 | Va 27081     | CF sputum, Halle, Germany, 1992                                                     | (Kong et al., 2005) |



**Table 3:** Summary of source of PCOR isolates and their sensitivity.

| <b>Source of isolation</b> | <b>Total number of strains</b> | <b>Number of sensitive strains (%)</b> |
|----------------------------|--------------------------------|----------------------------------------|
| CF                         | 34                             | 23 (68)                                |
| Clinical                   | 14                             | 12 (86)                                |
| Environmental              | 12                             | 8 (67)                                 |

**Table 4:** Summary of *P. aeruginosa* PCOR strains that were screened using planktonic cells.

| Analysis                                                        | Number of strains (%) |
|-----------------------------------------------------------------|-----------------------|
| Total strains screened*                                         | 69                    |
| Totals phages tested <sup>^</sup>                               | 6                     |
| No of sensitive strains                                         | 46 (66.6)             |
| Number of resistant strains                                     | 23 (33.3)             |
| Cocktail of phages required for 100 % sensitive strain coverage | 4 (66.6)              |

\*PCOR strains: strains environmentally, spatially and geographically distinct.

<sup>^</sup>Phages used in this experiment: P105, P134, P140, P168, P175B and P182.

**Table 5:** Sensitivity of *P. aeruginosa* PCOR strains that were screened using planktonic cells.

| Phage* | Low Titer <sup>^</sup> (Unique) <sup>#</sup> | Intermediate Titer | High Titer | Total number of Strains (%) <sup>^</sup> |
|--------|----------------------------------------------|--------------------|------------|------------------------------------------|
| P105   | 11 (2)                                       | 6                  | 2          | 19 (39)                                  |
| P134   | 23 (23)                                      | 6                  | 2          | 31 (63)                                  |
| P140   | 20 (10)                                      | 6 (1) <sup>#</sup> | 10         | 36 (74)                                  |
| P168   | 12 (1)                                       | 4                  | 4          | 20 (41)                                  |
| P175B  | 19 (7)                                       | 9                  | 2          | 30 (61)                                  |
| P182   | 18 (2)                                       | 2                  | 2          | 22 (45)                                  |

\*Phages used in this experiment: P105, P134, P140, P168, P175B and P182.

<sup>#</sup>Number of unique strains only susceptible to that phage at low titer. 45 out of the 46 strains were susceptible to one of the six phages at low titer. The 46th strain was susceptible to P140 at an intermediate titer.

<sup>^</sup>69 PCOR strains were screened against six phages for total of 414 spot titers. Low, Intermediate and High titer refers to sensitivity to  $10^{-6}$ ,  $10^{-3}$  and  $10^{-1}$  dilutions, respectively.

**Table 6:** Sensitivity of 47 PCOR strains to different multiplicity of infections (MOIs) in the biofilm inhibition assay.

| Phage* | Multiplicity of Infection (MOI) |        |       |       | Total number of strains (%)^ |
|--------|---------------------------------|--------|-------|-------|------------------------------|
|        | 10                              | 20     | 40    | 80    |                              |
| P105   | 13 (2) <sup>#</sup>             | 2      | 1     | 2     | 17 (37)                      |
| P134   | 16 (7)                          | 11 (2) | 3     | 1 (1) | 31 (67)                      |
| P140   | 19 (19)                         | 9 (5)  | 5 (1) | 3 (1) | 36 (78)                      |
| P168   | 11 (3)                          | 4 (1)  | 7     | 0     | 21 (46)                      |
| P175B  | 16 (3)                          | 6      | 6     | 2     | 30 (65)                      |
| P182   | 9 (1)                           | 8 (1)  | 1     | 4     | 22 (48)                      |

\*Phages used in this experiment: P105, P134, P140, P168, P175B and P182.

^46 Sensitive PCOR strains were screened against six phages

<sup>#</sup>The value in parentheses refers to the number of unique strains that are only susceptible to that phage at the given MOI. 35 out of the 46 strains were susceptible to various phages at MOI of 10.

**Table 7:** Summary of the sensitivity of 47 sensitive *P. aeruginosa* PCOR strains using the Biofilm Inhibition Assay (BIA).

| MOI   | Number of phages | Phages                              | Number of strains (%) |
|-------|------------------|-------------------------------------|-----------------------|
| 10    | 6                | P105, P134, P140, P168, P175B, P182 | 35 (74)               |
| 10-20 | 5                | P105, P134, P140, P168, P175B       | 42 (89)               |
| 10-40 | 4                | P105, P134, P140, P168              | 45 (96)               |
|       | 5                | P105, P134, P140, P168, P175B       | 46 (98)               |
| 10-80 | 3                | P105, P134, P140                    | 45 (96)               |
|       | 4                | P105, P134, P140, P168              | 47 (100)              |

**Table 8:** MIC and MBEC for PAO1 and the four PCOR isolates tested against P140, P168 and P175B.

| <b>Phage</b>   | <b>P140</b> |                         | <b>P168</b> |             | <b>P175</b> |             |
|----------------|-------------|-------------------------|-------------|-------------|-------------|-------------|
| <b>Strains</b> | <b>MIC*</b> | <b>MBEC<sup>^</sup></b> | <b>MIC</b>  | <b>MBEC</b> | <b>MIC</b>  | <b>MBEC</b> |
| PAO1           | >250        | <300                    | >200        | <300        | >250        | <300        |
| KGNI652        | >150        | >150                    | 100         | 200         | >100        | >250        |
| KGNI653        | >100        | >100                    | >100        | >150        | >100        | >250        |
| KGNI673        | >150        | >300                    | >100        | >300        | 100         | 250         |
| KGNI675        | >250        | <300                    | >150        | <300        | >100        | 250         |

\*MIC: Minimum inhibition concentration; the lowest MOI required to prevent recolonization of planktonic bacteria.

<sup>^</sup>MBEC: Minimum biofilm eradication concentration; the lowest MOI required to eradicate mature biofilms.

## Figure Legends

**Figure 1: Spot titer assay.** When the bacterial PAO1 lawn was seeded with phage P140 at serial dilutions, PAO1 was sensitive even at the highest dilution.

**Figure 2: Schematic representation of the Biofilm Inhibition Assay (BIA).** This assay is performed to determine if phages are useful in preventing biofilm formation. It starts with streaking the target strain on an LB agar plate. After an overnight culture a 1:100 dilution is made and inoculated in polyvinylchloride (PVC) plates along with phages at different multiplicities of infection (10, 20, 40 and 80). After an incubation period of 10 h, crystal violet is added to the plate and it is then washed with ethanol and transferred to a microtiter plate and the optical density is measured at 600 nm. The lethal dose of 50 (LD<sub>50</sub>) is recorded as the biofilm inhibition.

**Figure 3: Microtiter plate in the biofilm inhibition assay:** The phages were tested at MOIs of 10, 20, 40 and 80 for their ability to prevent initiation of *P. aeruginosa* biofilms. The biofilms were scored using crystal violet (CV) at an OD of 600 nm. The intensity of the color observed is proportional to the ineffectiveness of phage against biofilm initiation. In this picture, the five rows exhibit five different strains tested with phage, P140. Some of the strains required a low MOI of 10 for inhibition, eg. Row 2, whereas certain bacterial strains required higher MOIs, eg. Row 5.

**Figure 4: Flowchart for the biofilm eradication assay.** The five-day assay begins with streaking the target strain on an LB agar plate. A day later an overnight culture is

prepared which is diluted the following day 1:30 and inoculated in the CBD plate. A challenge plate is made on Day 3 with the appropriate phages and the cation-adjusted Mueller Hinton Broth (CAMHB). After an incubation period of 24 h, the (MIC) Minimum Inhibition Concentration (MIC) was measured at an  $OD_{600}$ . The pegged lid is then sonicated to dislodge any surviving biofilm cells and incubated for an additional day. The minimum biofilm eradication concentration (MBEC) is measured.

**Figure 5: Biofilm inhibition assay with different MOIs.** When lower MOIs were used some strains were sensitive, e.g. 1698, with P134 whereas some strains were resistant even at the highest MOI of 5, e.g. 1704, with P134.

**Figure 6: Biofilm inhibition assay showing the  $LD_{50}$  values.** When the MOI was increased from 10 to 80 all the strains turned out to be sensitive. However, some required only an MOI of 10, e.g. 1653, with P105 while some required a very high MOI of 80. The  $LD_{50}$  values varied with the strains as indicated by the arrows.

**Figure 7: MIC and MBEC of 1653 plotted against MOI.** The MOI required for MIC, that is the concentration of phage required to prevent recolonization of planktonic bacteria from the biofilms is only a 100. However, the MBEC the concentration of phage required for eradication of mature biofilm is 200.



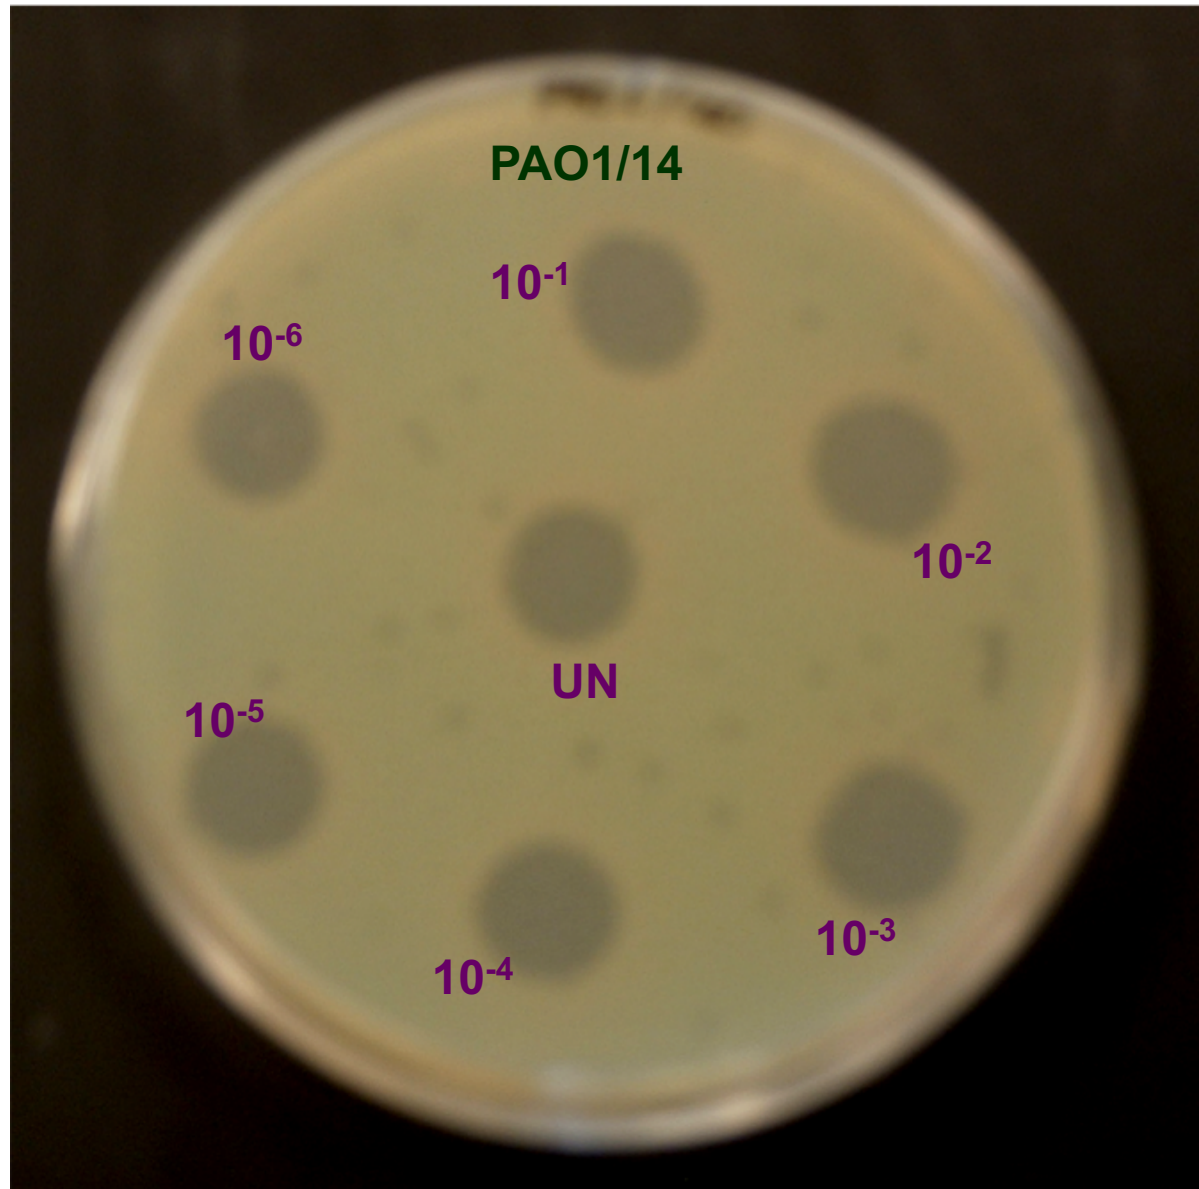

Figure 1: Spot titer assay.

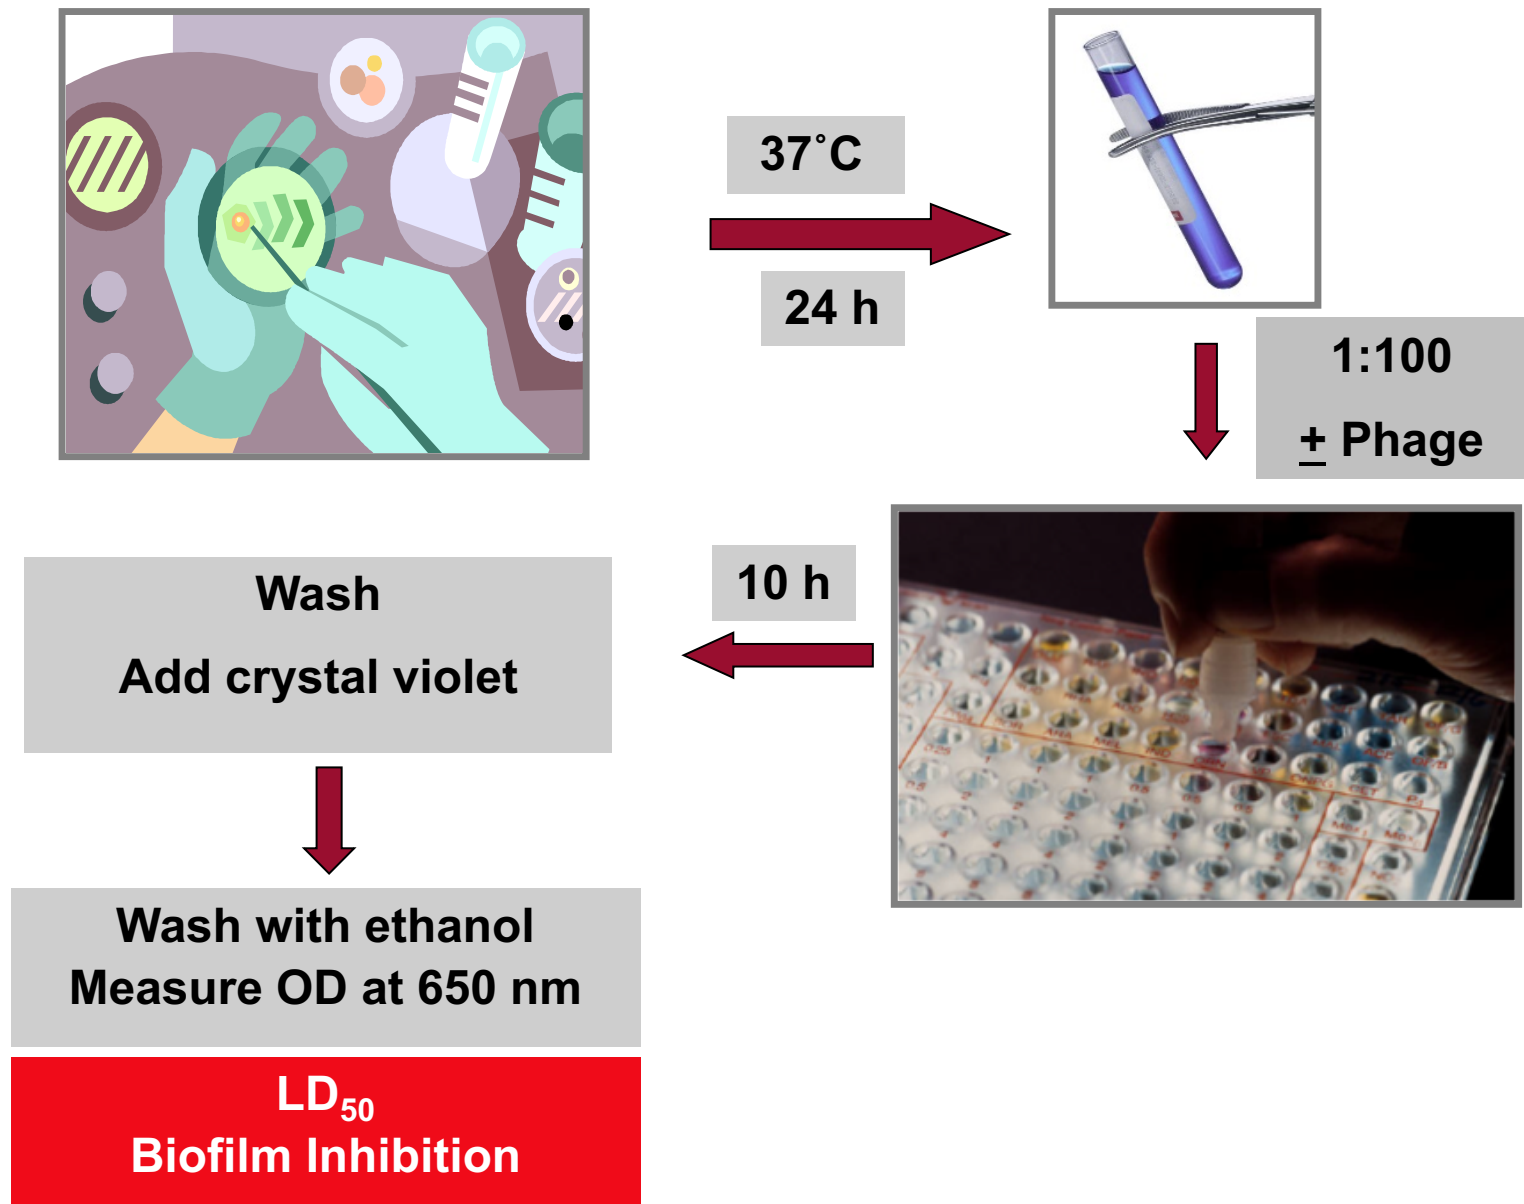

Figure 2: Schematic representation of the Biofilm Inhibition Assay (BIA).

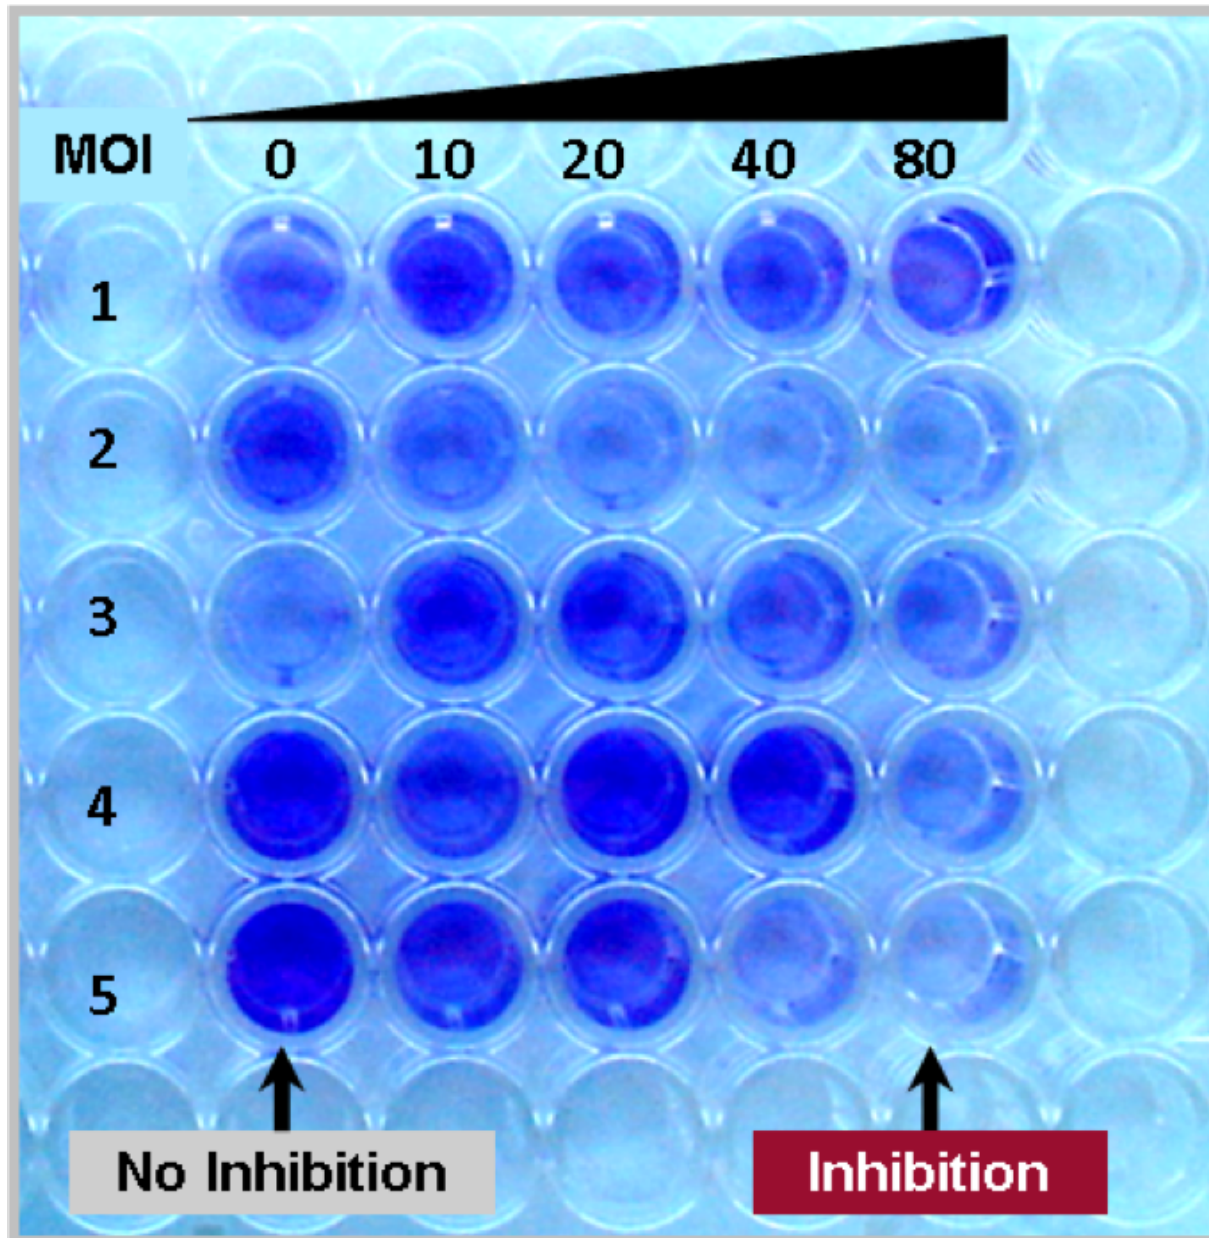

Figure 3: Microtiter plate in the biofilm assay.

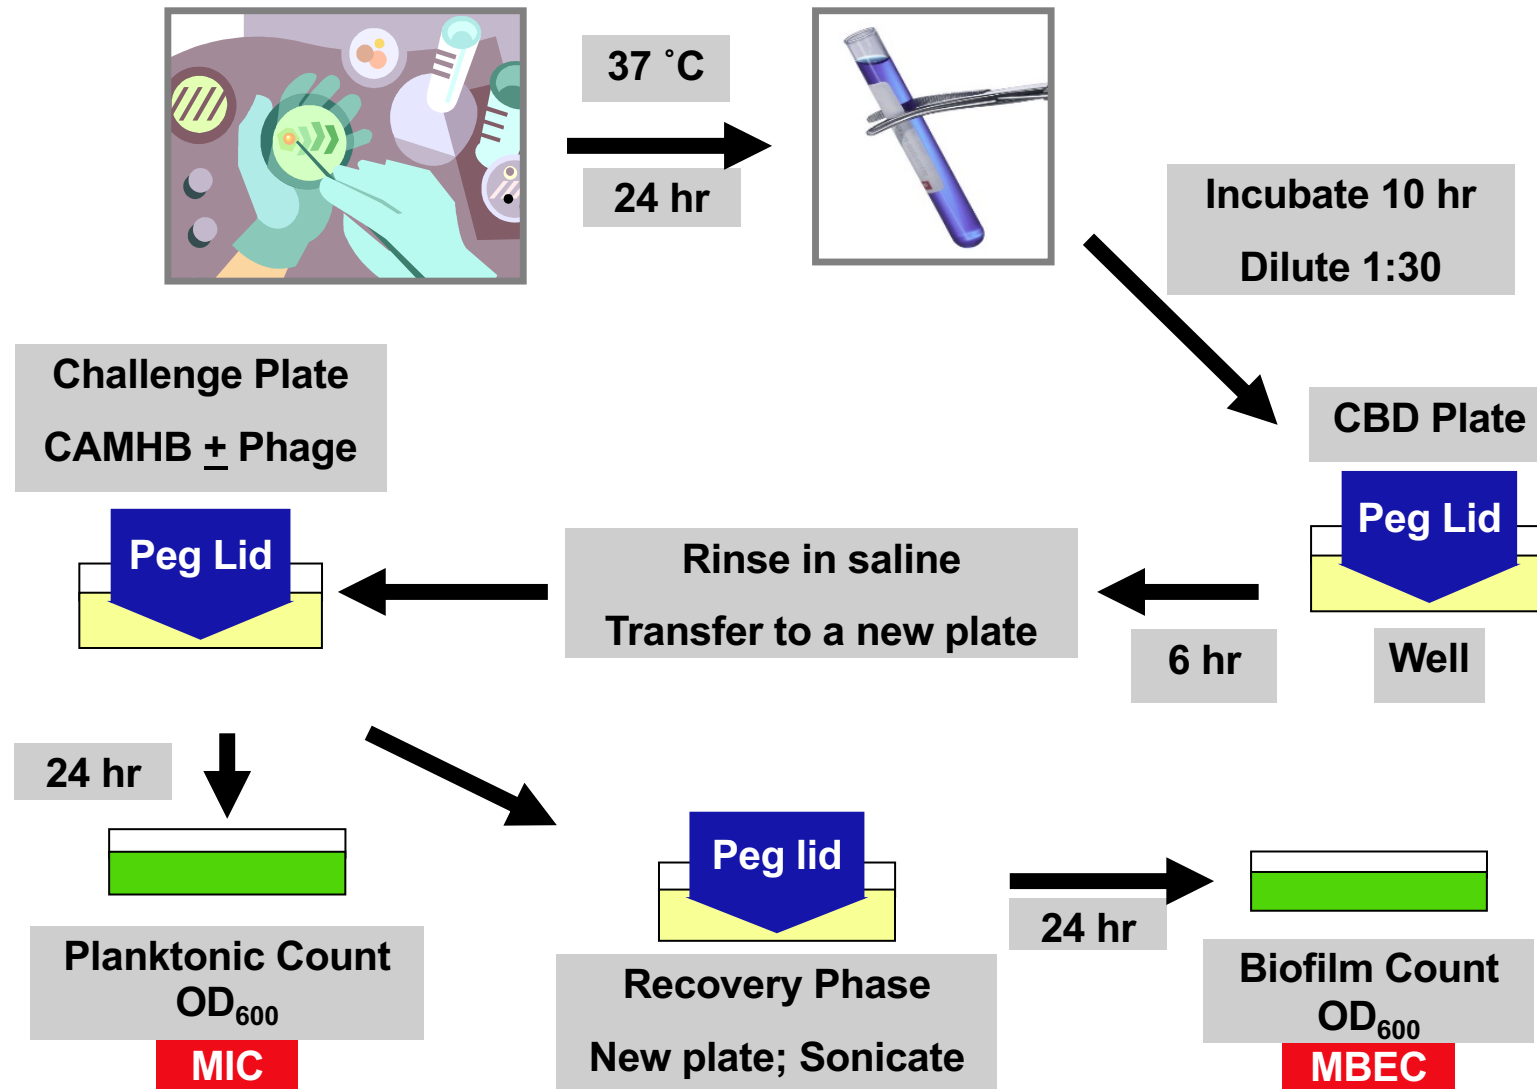

Figure 4: Flowchart for the biofilm eradication assay.

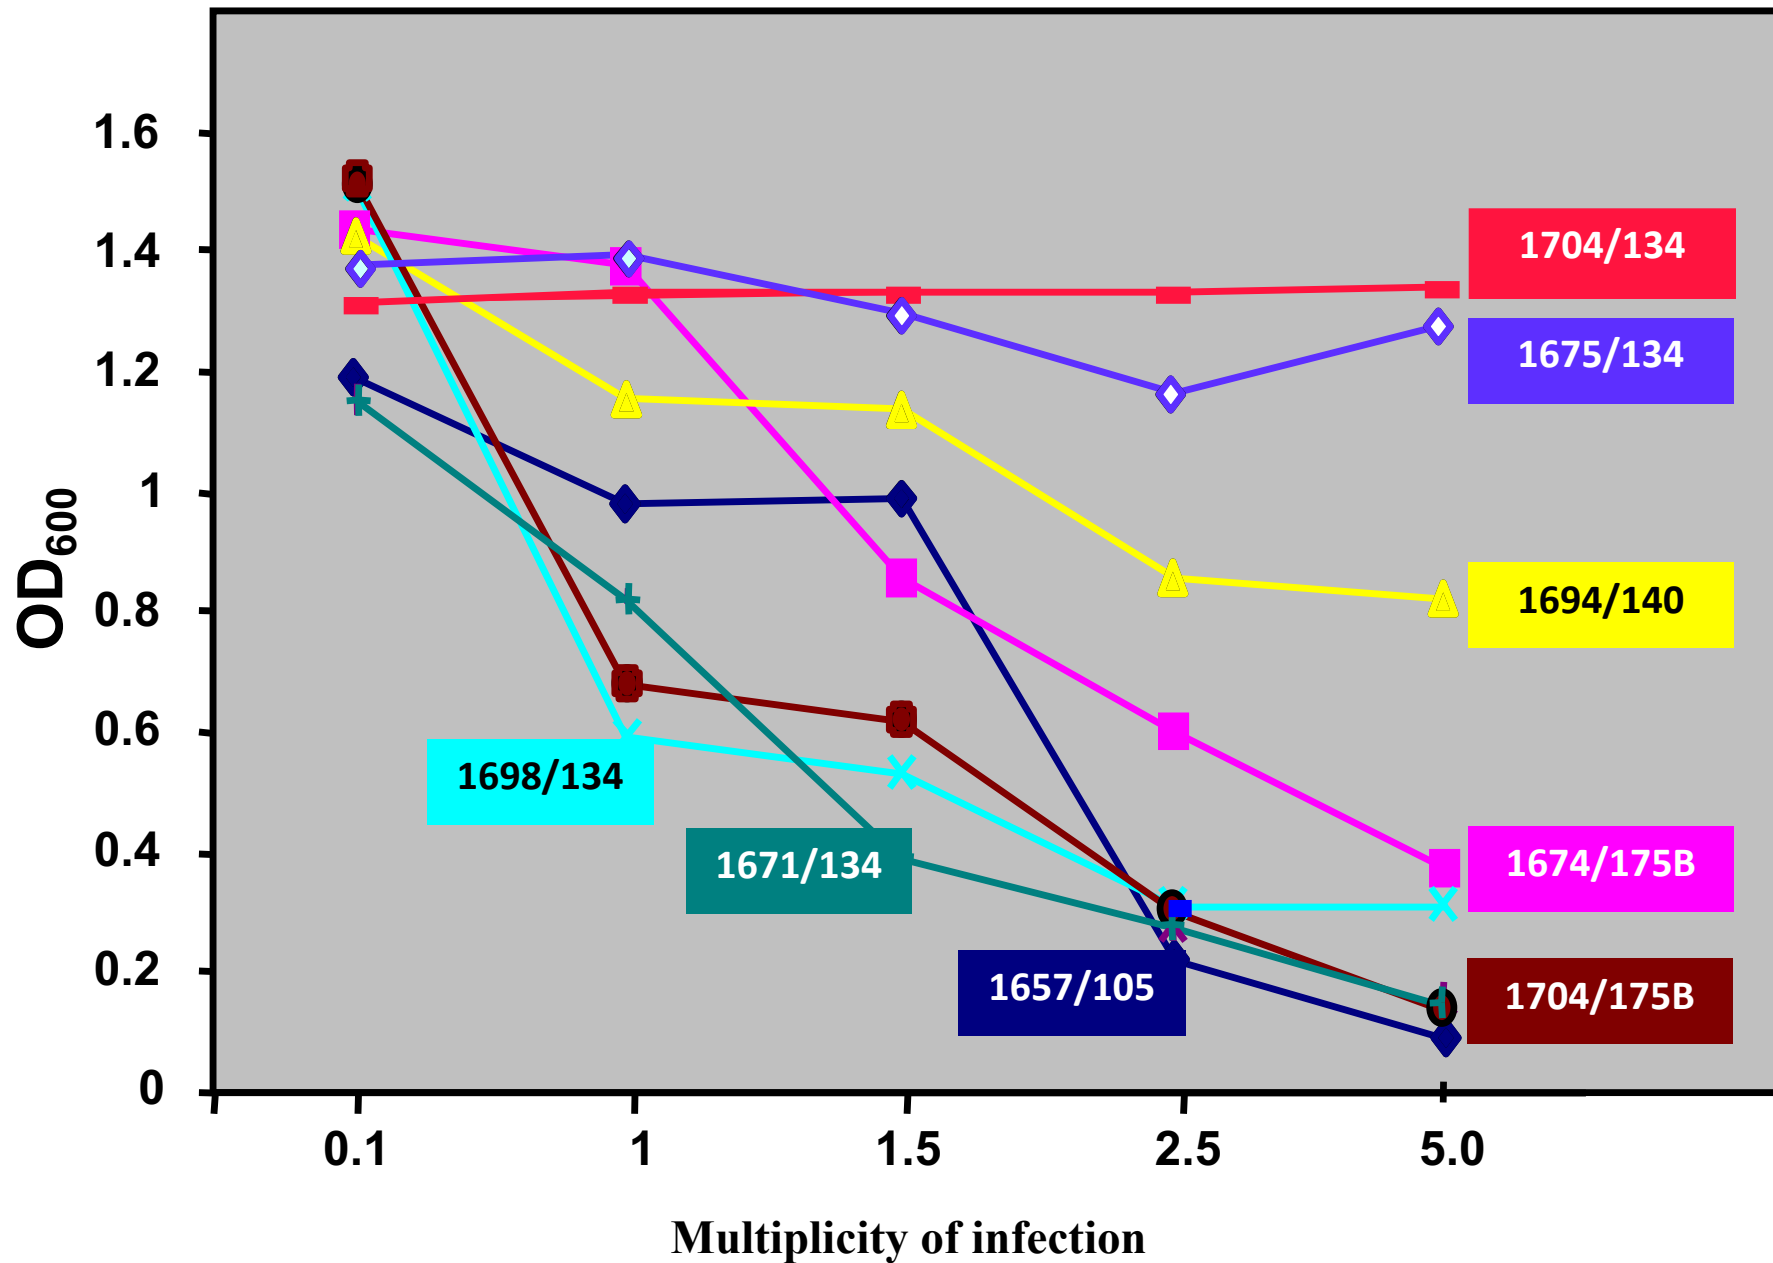

Figure 5: Biofilm inhibition assay with different MOIs.

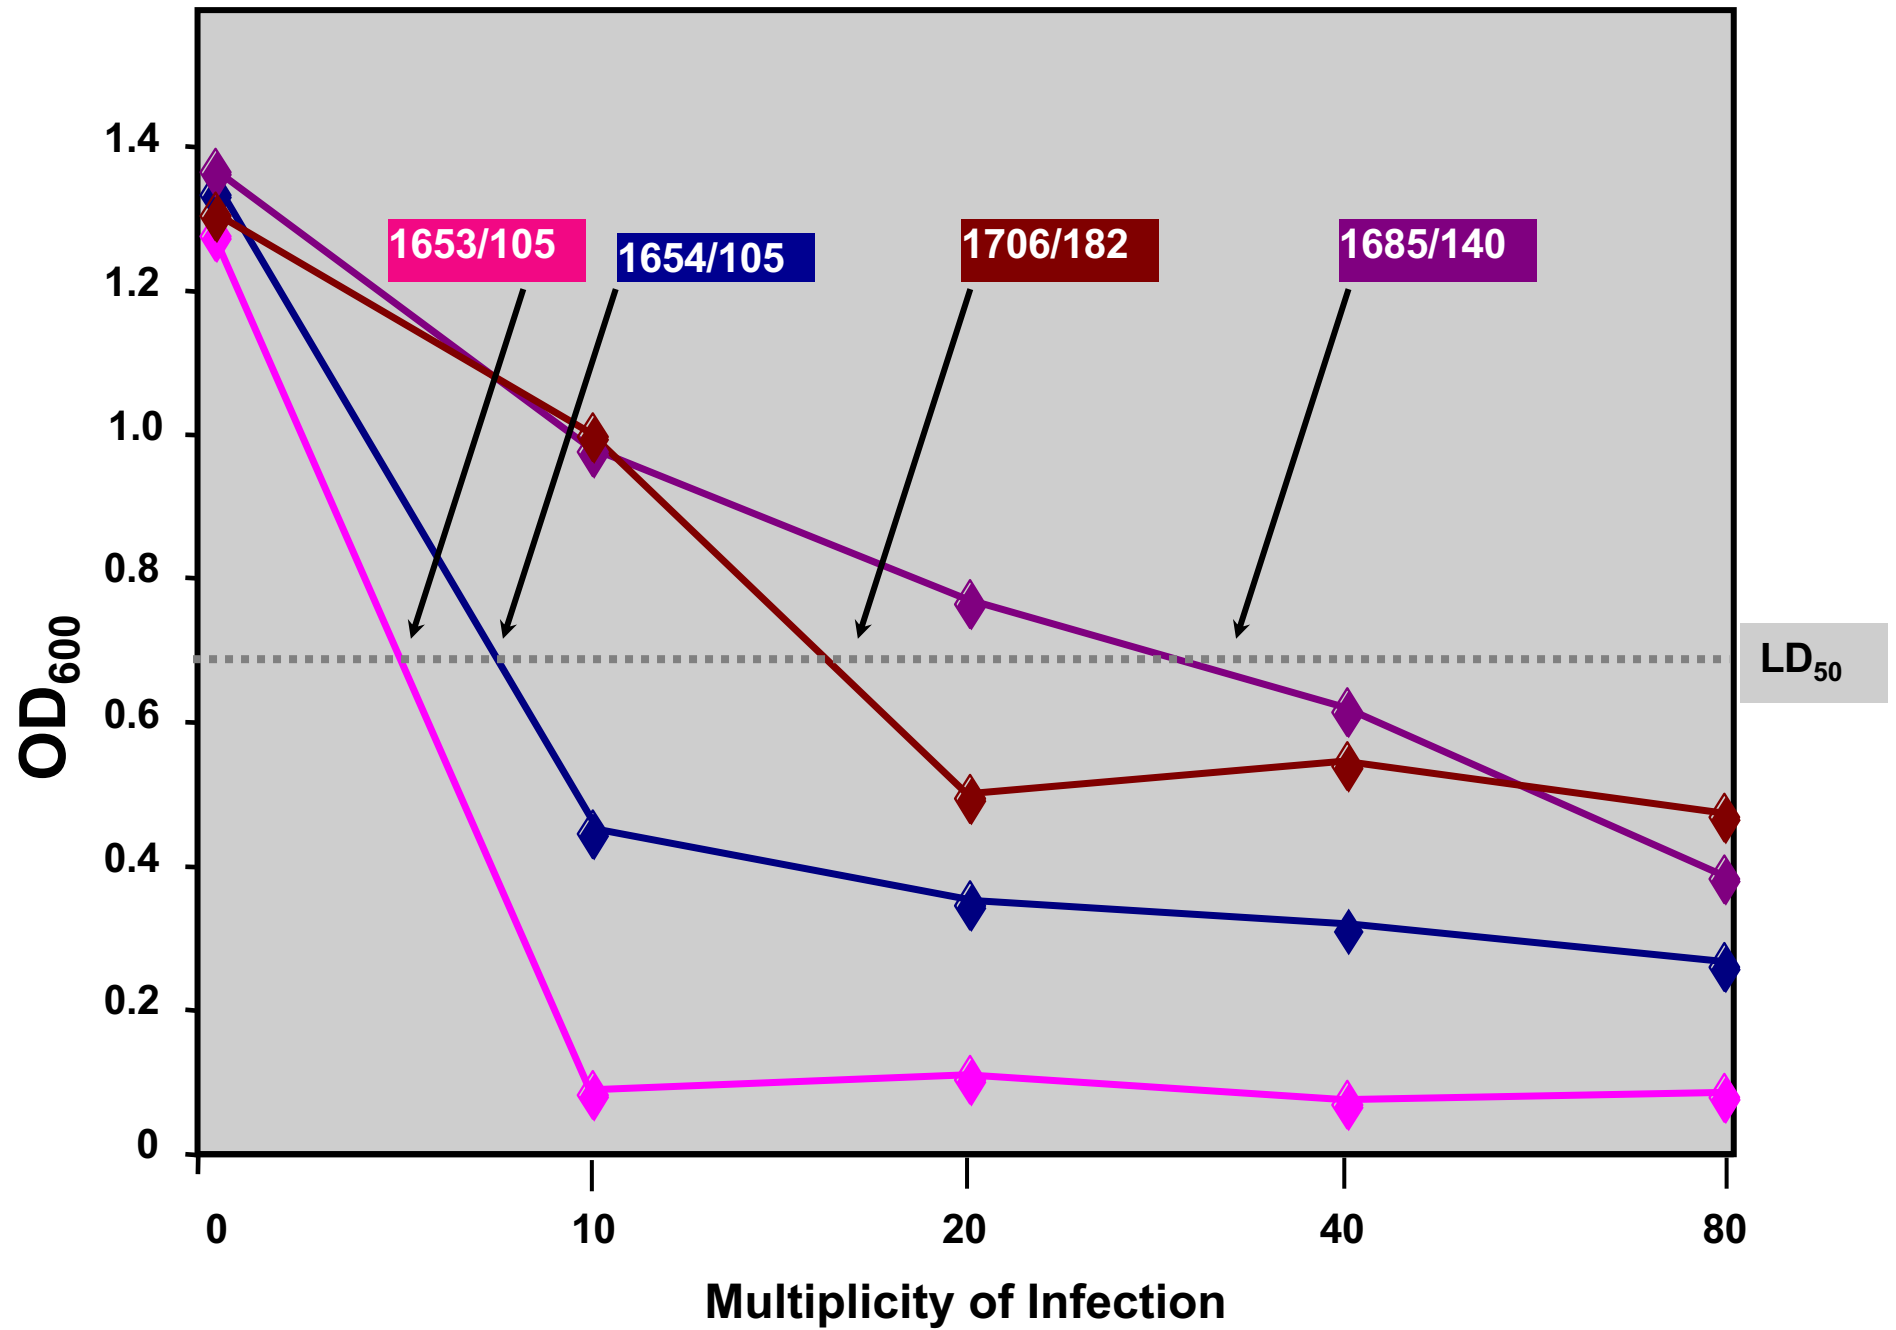

Figure 6: Biofilm inhibition assay showing the LD<sub>50</sub> values.

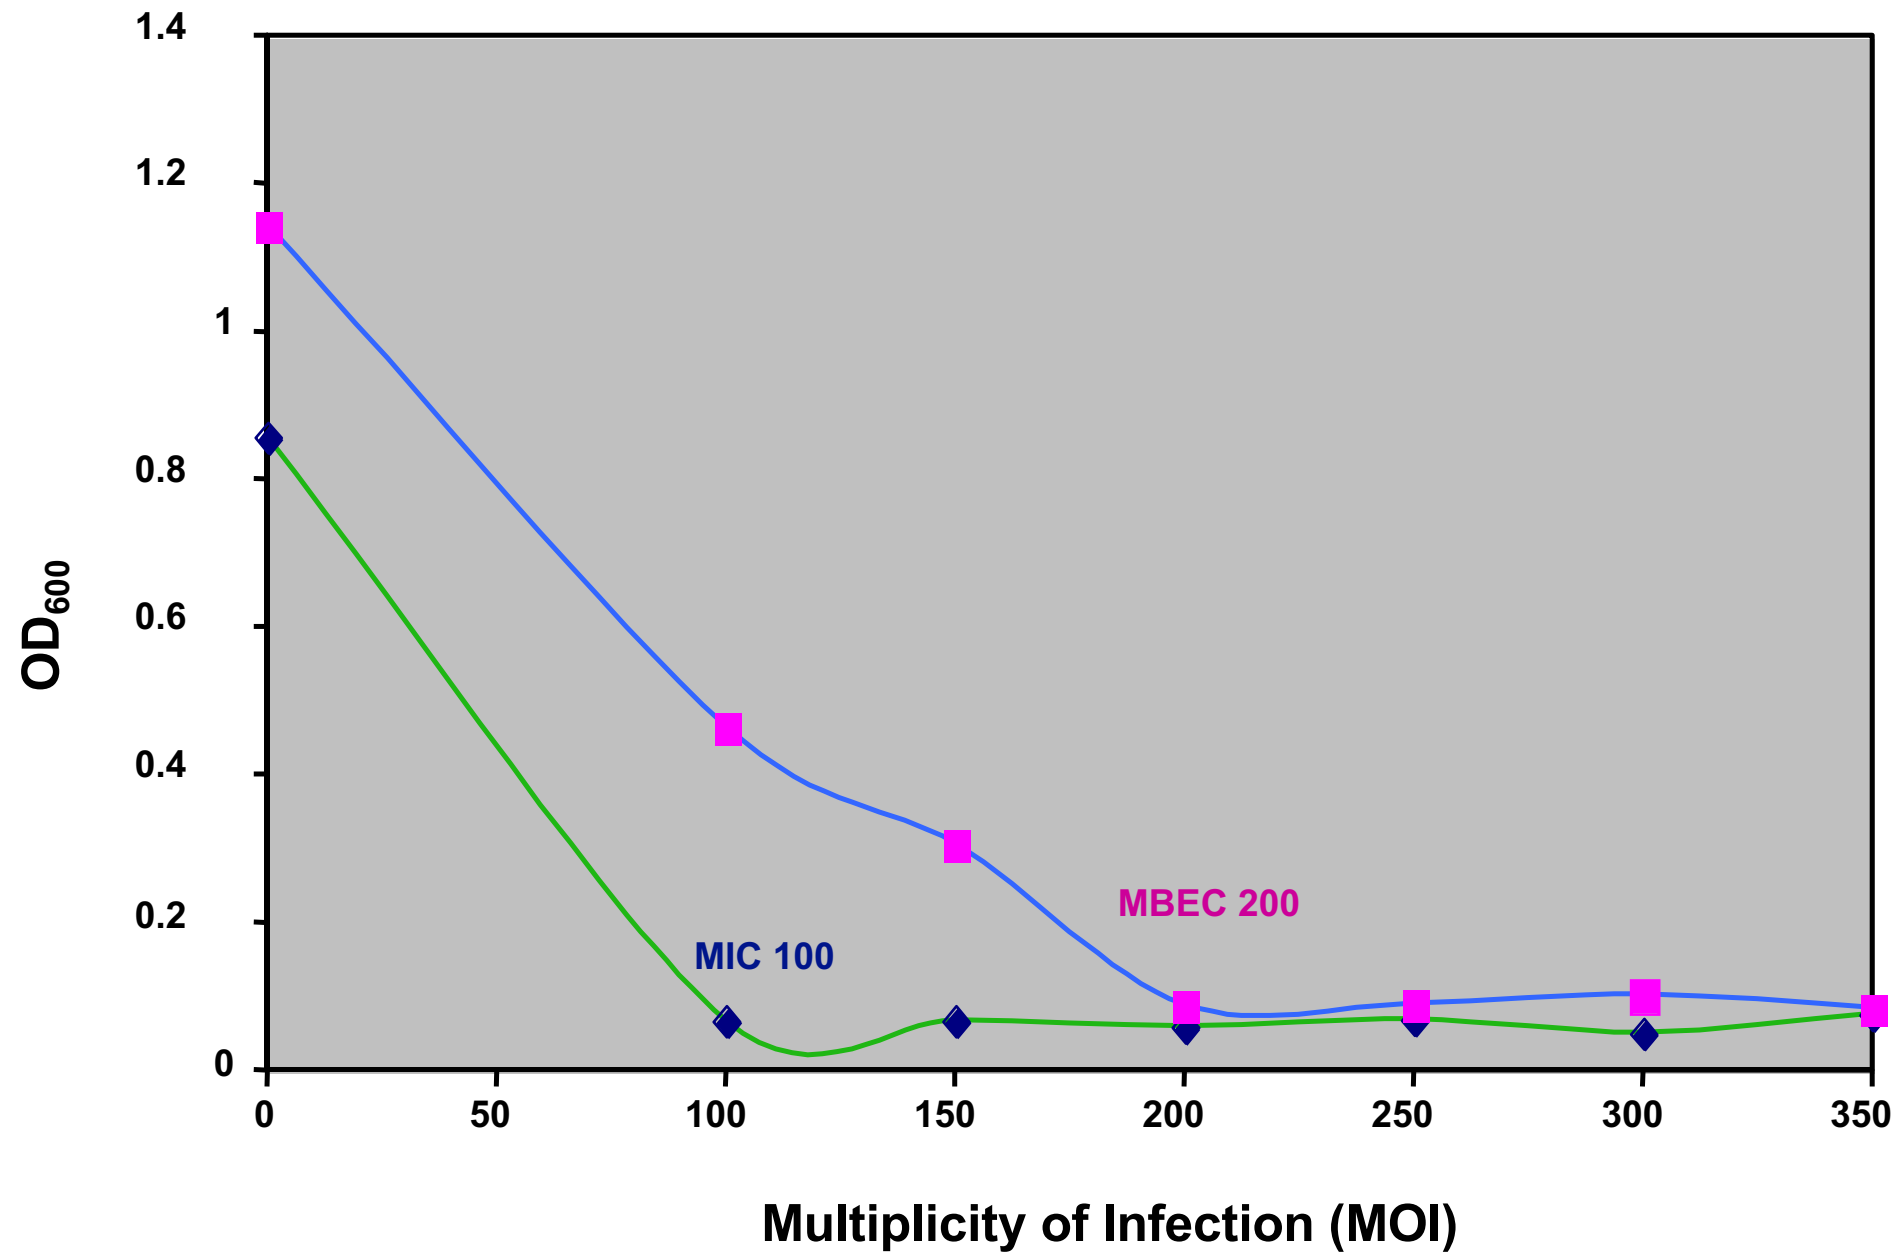

Figure 7: MIC and MBEC of 1653 plotted against MOI.
